# Supplementary material for: Heterotopic ossification vs. fracture healing: Extracellular vesicle cargo proteins shed new light on bone formation
Source: PubMed Central journal article supplement — Bone Rep. 2022 Feb 28;16:101177. doi: 10.1016/j.bonr.2022.101177 (PMC8892095; doi:10.1016/j.bonr.2022.101177), 2022-02-28
Supplement: mmc2.pdf [file mmc2.pdf]

**Supplementary table 3.** Mass spectrometry proteomics data - proteins identified across the experimental samples.

| Sample           | Protein IDs                  | Protein names                                                      | Gene names          | Peptides | Intensity |
|------------------|------------------------------|--------------------------------------------------------------------|---------------------|----------|-----------|
| Healthy controls | P02768-1;P02768;A0A0C4DGB6;  | Serum albumin                                                      | ALB                 | 19       | 6.86E+09  |
| Healthy controls | A0A087WYJ9;A0A075B6N9;A0A1   | Ig mu chain C region;Ig mu heavy chain disease protein             | IGHM                | 11       | 1.59E+09  |
| Healthy controls | P02647;F8W696                | Apolipoprotein A-I;Proapolipoprotein A-I;Truncated apolipopro      | APOA1               | 13       | 1.25E+09  |
| Healthy controls | A0A024R6I7;P01009;A0A0G2JRM  | Alpha-1-antitrypsin;Short peptide from AAT                         | SERPINA1            | 9        | 6.06E+08  |
| Healthy controls | P04114;A8MUN2;ENSEMBL:ENSE   | Apolipoprotein B-100;Apolipoprotein B-48                           | APOB                | 37       | 5.15E+08  |
| Healthy controls | P02671-2;P02671;A0A087WUA0   | Fibrinogen alpha chain;Fibrinopeptide A;Fibrinogen alpha chain     | FGA                 | 12       | 4.86E+08  |
| Healthy controls | C9JEU5;C9JC84;P02679-2;P0267 | Fibrinogen gamma chain                                             | FGG                 | 7        | 4.6E+08   |
| Healthy controls | P01023;H0YFH1;P20742-2;P2074 | Alpha-2-macroglobulin                                              | A2M                 | 18       | 4.08E+08  |
| Healthy controls | A0A0C4DGL8;J3QR68;H0Y300;P0  | Haptoglobin;Haptoglobin alpha chain;Haptoglobin beta chain;H       | HP;HPR              | 7        | 3.56E+08  |
| Healthy controls | P01861;A0A0A0MS07;A0A075B6   | Ig gamma-4 chain C region;Ig gamma-2 chain C region;Ig gamma       | IGHG4;IGHG1;IGHG3   | 2        | 3.12E+08  |
| Healthy controls | P02675;D6REL8;P02676         | Fibrinogen beta chain;Fibrinopeptide B;Fibrinogen beta chain       | FGB                 | 3        | 1.82E+08  |
| Healthy controls | V9GYE3;V9GYG9;V9GYM3;P0265   | Apolipoprotein A-II;Proapolipoprotein A-II;Truncated apolipopro    | APOA2               | 3        | 1.56E+08  |
| Healthy controls | Q68DL7                       | Uncharacterized protein C18orf63                                   | C18orf63            | 1        | 1.32E+08  |
| Healthy controls | P69905                       | Hemoglobin subunit alpha                                           | HBA1                | 2        | 1.25E+08  |
| Healthy controls | B0YIW2;P02656                | Apolipoprotein C-III                                               | APOC3               | 2        | 1.23E+08  |
| Healthy controls | P13645;P13645;A2A4G1;P02533  | Keratin, type I cytoskeletal 10;Keratin, type I cytoskeletal 14;Ke | KRT10;KRT14;KRT16   | 5        | 1.1E+08   |
| Healthy controls | P02747                       | Complement C1q subcomponent subunit C                              | C1QC                | 3        | 1.1E+08   |
| Healthy controls | A0A0G2JMB2;P01877;P01876;A0  | Ig alpha-2 chain C region;Ig alpha-1 chain C region                | IGHA2;IGHA1         | 4        | 99588000  |
| Healthy controls | A6NL76;P63267-2;P63261;P6070 | Actin, gamma-enteric smooth muscle;Actin, cytoplasmic 2;Actin      | ACTA1;ACTG2;ACTG    | 2        | 75031000  |
| Healthy controls | P04264;P04264;H-INV:HIT00001 | Keratin, type II cytoskeletal 1                                    | KRT1                | 4        | 71608000  |
| Healthy controls | G3V3I7;G3V3F7;Q96KN7-6;Q96K  | X-linked retinitis pigmentosa GTPase regulator-interacting prote   | RPGRIP1             | 1        | 60970000  |
| Healthy controls | C9JA05;D6RHH6;D6RD17;P01591  | Immunoglobulin J chain                                             | JCHAIN;IGJ          | 2        | 60204000  |
| Healthy controls | F8W6P5;P68871;A0A0J9YWK4;C   | Hemoglobin subunit beta;LVV-hemorphin-7;Spinorphin;Hemog           | HBB;HBD             | 2        | 59284000  |
| Healthy controls | Q9ULF5-2;Q9ULF5              | Zinc transporter ZIP10                                             | SLC39A10            | 1        | 52010000  |
| Healthy controls | P01834;A0A075B6H6            | Ig kappa chain C region                                            | IGKC                | 2        | 45940000  |
| Healthy controls | A0A140TA49;A0A140TA32;A0A1   | Complement C4-A;Complement C4 beta chain;Complement C4-            | C4A;C4B             | 6        | 41578000  |
| Healthy controls | Q502W7                       | Coiled-coil domain-containing protein 38                           | CCDC38              | 1        | 30153000  |
| Healthy controls | A0A075B6L0;A0A075B6K9;POCG   | Ig lambda-3 chain C regions;Ig lambda-2 chain C regions;Ig lambda  | IGLC3;IGLC2;IGLC6;I | 4        | 26887000  |
| Healthy controls | A0A0B4J231;B9A064            | Immunoglobulin lambda-like polypeptide 5                           | IGLL5               | 3        | 26094000  |
| Healthy controls | P08519;A0A087WWY0            | Apolipoprotein(a)                                                  | LPA                 | 2        | 24739000  |

|                  |                                 |                                                                   |                     |    |          |
|------------------|---------------------------------|-------------------------------------------------------------------|---------------------|----|----------|
| Healthy controls | P04003                          | C4b-binding protein alpha chain                                   | C4BPA               | 1  | 20532000 |
| Healthy controls | G3V3A0;P01011                   | Alpha-1-antichymotrypsin;Alpha-1-antichymotrypsin His-Pro-le      | SERPINA3            | 1  | 18435000 |
| Healthy controls | P02649                          | Apolipoprotein E                                                  | APOE                | 2  | 16530000 |
| Healthy controls | E9PFZ2;ENSEMBL:ENSBTAP00000     | Ceruloplasmin                                                     | CP                  | 1  | 14036000 |
| Healthy controls | P06727                          | Apolipoprotein A-IV                                               | APOA4               | 1  | 12939000 |
| Healthy controls | P10909-3;P10909-4;P10909;P10909 | Clusterin;Clusterin beta chain;Clusterin alpha chain;Clusterin    | CLU                 | 2  | 9731200  |
| Healthy controls | D6RF35;P02774-2;P02774;P02774   | Vitamin D-binding protein                                         | GC                  | 1  | 9673000  |
| Healthy controls | P04004                          | Vitronectin;Vitronectin V65 subunit;Vitronectin V10 subunit;So    | VTN                 | 1  | 8863100  |
| Healthy controls | AOA075B6K4;P01715               | Ig lambda chain V-IV region Bau                                   | IGLV3-10            | 1  | 5588100  |
| Healthy controls | AOA096LPE2;P35542               | Serum amyloid A-4 protein                                         | SAA2-SAA4;SAA4      | 1  | 5139000  |
| Healthy controls | AOA0U1RQF0;P49327               | Fatty acid synthase;[Acyl-carrier-protein] S-acetyltransferase;[A | FASN                | 1  | 4608500  |
| Healthy controls | AOA087WU14;AOA087WXB0;O15       | Secretory carrier-associated membrane protein 1                   | SCAMP1              | 1  | 3841100  |
| Healthy controls | P02749                          | Beta-2-glycoprotein 1                                             | APOH                | 1  | 2785500  |
| Healthy controls | Q6P163;AOA024R0T9;K7ER74;PO     | Apolipoprotein C-II;Proapolipoprotein C-II                        | APOC2;APOC4-APOC    | 1  | 2224500  |
| Healthy controls | Q6R2W3;AOA140T9Y6               | SCAN domain-containing protein 3                                  | ZBED9               | 2  | 381440   |
| Bone fractures   | P02768-1;P02768;AOA0C4DGB6;     | Serum albumin                                                     | ALB                 | 21 | 2.98E+10 |
| Bone fractures   | P02671-2;P02671;AOA087WUA0      | Fibrinogen alpha chain;Fibrinopeptide A;Fibrinogen alpha chain    | FGA                 | 23 | 1.59E+10 |
| Bone fractures   | C9JEU5;C9JC84;P02679-2;P02679   | Fibrinogen gamma chain                                            | FGG                 | 11 | 8.38E+09 |
| Bone fractures   | P02647;F8W696                   | Apolipoprotein A-I;Proapolipoprotein A-I;Truncated apolipopro     | APOA1               | 13 | 6.52E+09 |
| Bone fractures   | AOA0C4DGL8;J3QR68;H0Y300;PO     | Haptoglobin;Haptoglobin alpha chain;Haptoglobin beta chain;H      | HP;HPR              | 5  | 3.46E+09 |
| Bone fractures   | AOA024R6I7;P01009;AOA0G2JRN     | Alpha-1-antitrypsin;Short peptide from AAT                        | SERPINA1            | 7  | 2.28E+09 |
| Bone fractures   | P02675;D6REL8;P02676            | Fibrinogen beta chain;Fibrinopeptide B;Fibrinogen beta chain      | FGB                 | 8  | 3.14E+09 |
| Bone fractures   | A6NMB1                          | Sialic acid-binding Ig-like lectin 16                             | SIGLEC16            | 1  | 9.74E+08 |
| Bone fractures   | V9GYE3;V9GYG9;V9GYM3;P0265      | Apolipoprotein A-II;Proapolipoprotein A-II;Truncated apolipopro   | APOA2               | 3  | 6.64E+08 |
| Bone fractures   | P69905;G3V1N2;P02008            | Hemoglobin subunit alpha                                          | HBA1;HBA2           | 5  | 6.76E+09 |
| Bone fractures   | P63261;P60709;P68133;P68032;    | Actin, cytoplasmic 2;Actin, cytoplasmic 2, N-terminally processe  | ACTG1;ACTB;ACTA1    | 14 | 1.38E+10 |
| Bone fractures   | P68871;F8W6P5;P02042;E9PEW      | Hemoglobin subunit beta;LVV-hemorphin-7;Spinorphin;Hemog          | HBB;HBD             | 7  | 4.79E+08 |
| Bone fractures   | AOA0A0MS08;P01857;AOA0A0M       | Ig gamma-1 chain C region;Ig gamma-3 chain C region               | IGHG1;IGHG3         | 4  | 1.94E+09 |
| Bone fractures   | AOA024R0T9;K7ER74;P02655;Q6     | Apolipoprotein C-II;Proapolipoprotein C-II                        | APOC2;APOC4-APOC    | 4  | 1.02E+09 |
| Bone fractures   | AOA087WYJ9;AOA075B6N9;AOA1      | Ig mu chain C region;Ig mu heavy chain disease protein            | IGHM                | 7  | 7.9E+08  |
| Bone fractures   | P04264;P04264;Q922U2;Q5XQN      | Keratin, type II cytoskeletal 1                                   | KRT1                | 3  | 3.3E+08  |
| Bone fractures   | AOA087WWY0;P08519               | Apolipoprotein(a)                                                 | LPA                 | 1  | 1.3E+08  |
| Bone fractures   | AOA075B6L0;AOA075B6K9;POCG      | Ig lambda-3 chain C regions;Ig lambda-2 chain C regions;Ig lambda | IGLC3;IGLC2;IGLC7;I | 2  | 1.53E+08 |

|                |                                                |                                                                                                                   |                   |    |          |
|----------------|------------------------------------------------|-------------------------------------------------------------------------------------------------------------------|-------------------|----|----------|
| Bone fractures | J3KNV4;Q13683-13;Q13683-9;Q13683-10            | Integrin alpha-7;Integrin alpha-7 heavy chain;Integrin alpha-7 light chain                                        | ITGA7             | 1  | 7.51E+08 |
| Bone fractures | P01834                                         | Ig kappa chain C region                                                                                           | IGKC              | 1  | 60983000 |
| Bone fractures | H0YJV2;Q9NUV7;O15270                           | Serine palmitoyltransferase 3;Serine palmitoyltransferase 2                                                       | SPTLC2;SPTLC3     | 1  | 43775000 |
| Bone fractures | P01023;H0YFH1;P20742-2;P20742-1                | Alpha-2-macroglobulin                                                                                             | A2M               | 4  | 1.8E+08  |
| Bone fractures | P01024                                         | Complement C3;Complement C3 beta chain;C3-beta-c;Complement C3 gamma chain                                        | C3                | 3  | 13486000 |
| Bone fractures | E9PFZ2;ENSEMBL:ENSBTAP0000038253               | Ceruloplasmin                                                                                                     | CP                | 1  | 66123000 |
| Bone fractures | ENSEMBL:ENSBTAP00000038253                     | Keratin, type II cytoskeletal 3;Keratin, type II cytoskeletal 2 oral                                              | KRT3;KRT76;KRT2   | 1  | 18826000 |
| Bone fractures | Q5VT98                                         | PRAME family member 20/21                                                                                         | PRAMEF20          | 1  | 5855600  |
| Bone fractures | AOA075B6K4;P01715                              | Ig lambda chain V-IV region Bau                                                                                   | IGLV3-10          | 1  | 3498300  |
| Bone fractures | AOA087WWY3;Q5HY54;Q60FE5;Q60FE6                | Filamin-A                                                                                                         | FLNA              | 7  | 1.89E+08 |
| Bone fractures | AOA087WZ02                                     | Diacylglycerol kinase eta                                                                                         |                   | 1  | 4.49E+08 |
| Bone fractures | B0YIW2;P02656                                  | Apolipoprotein C-III                                                                                              | APOC3             | 2  | 2.41E+08 |
| Bone fractures | P08514-3;P08514-2;P08514-1                     | Integrin alpha-IIb;Integrin alpha-IIb heavy chain;Integrin alpha-IIb light chain                                  | ITGA2B            | 3  | 1.37E+08 |
| Bone fractures | P02775                                         | Platelet basic protein;Connective tissue-activating peptide III;Thrombospondin type 1 domain containing protein 1 | PPBP              | 1  | 1.27E+08 |
| Bone fractures | Q9Y490;H0YMT1;AOA1C7CYV7;AOA1C7CYV8            | Talin-1                                                                                                           | TLN1              | 5  | 87307000 |
| Bone fractures | P02649;E9PEV4;E7ERP7;H0Y7L5                    | Apolipoprotein E                                                                                                  | APOE              | 2  | 81496000 |
| Bone fractures | P02787;H7C5E8                                  | Serotransferrin                                                                                                   | TF                | 1  | 56072000 |
| Bone fractures | F5H823;B7ZB78;F5GZG1;F5GX62                    | Ras-related protein Rap-1b;Ras-related protein Rap-1A;Ras-related protein Rap-1B                                  | RAP1B;RAP1A       | 1  | 49952000 |
| Bone fractures | AOA0G2JMB2;AOA075B6N7;P01834                   | Ig alpha-2 chain C region;Ig alpha-1 chain C region                                                               | IGHA2;IGHA1       | 1  | 25960000 |
| Bone fractures | P61586                                         | Transforming protein RhoA                                                                                         | RHOA              | 1  | 2618800  |
| Bone fractures | E7EX29;P63104;B7Z2E6;H0YB80;H0YB81             | 14-3-3 protein zeta/delta                                                                                         | YWHAZ             | 3  | 0        |
| Bone fractures | AOA0A0MS98;P02730-2;P02730-1                   | Band 3 anion transport protein                                                                                    | SLC4A1            | 1  | 0        |
| Bone fractures | I3L4X8;H3BM21;P05106-2;P05106-1                | Integrin beta;Integrin beta-3                                                                                     | ITGB3             | 1  | 0        |
| Bone fractures | P13224;P13224-2                                | Platelet glycoprotein Ib beta chain                                                                               | GP1BB             | 1  | 0        |
| Bone fractures | AOA1B0GV03                                     | Golgin subfamily A member 6-like protein 7                                                                        |                   | 1  | 0        |
| Bone fractures | C9JV77;P02765                                  | Alpha-2-HS-glycoprotein;Alpha-2-HS-glycoprotein chain A;Alpha-2-HS-glycoprotein chain B                           | AHSG              | 1  | 0        |
| Bone fractures | Q7Z3Z0;A2A4G1;Q7Z3Y8;Q148H                     | Keratin, type I cytoskeletal 25;Keratin, type I cytoskeletal 27;Keratin, type I cytoskeletal 28                   | KRT25;KRT27;KRT28 | 1  | 0        |
| Bone fractures | P35527;P35527                                  | Keratin, type I cytoskeletal 9                                                                                    | KRT9              | 1  | 0        |
| Bone fractures | P02749                                         | Beta-2-glycoprotein 1                                                                                             | APOH              | 1  | 0        |
| FOP remission  | P02647;F8W696;P15497                           | Apolipoprotein A-I;Proapolipoprotein A-I;Truncated apolipoprotein A-I                                             | APOA1             | 38 | 3.06E+11 |
| FOP remission  | P01023;F8W7L3;H0YFH1;ENSEMBL:ENSBTAP0000038253 | Alpha-2-macroglobulin                                                                                             | A2M               | 62 | 2.29E+11 |
| FOP remission  | P01024;Q2UVX4;M0QYC8;M0QXC                     | Complement C3;Complement C3 beta chain;C3-beta-c;Complement C3 gamma chain                                        | C3                | 89 | 1.72E+11 |
| FOP remission  | P02671;P02671-2;AOA087WUA0                     | Fibrinogen alpha chain;Fibrinopeptide A;Fibrinogen alpha chain 2                                                  | FGA               | 35 | 1.67E+11 |

|               |                               |                                                                  |                   |     |          |
|---------------|-------------------------------|------------------------------------------------------------------|-------------------|-----|----------|
| FOP remission | A0A087WYJ9;A0A075B6N9;A0A1    | Ig mu chain C region;Ig mu heavy chain disease protein           | IGHM              | 26  | 1.2E+11  |
| FOP remission | P02675;D6REL8;P02676          | Fibrinogen beta chain;Fibrinopeptide B;Fibrinogen beta chain     | FGB               | 38  | 1.13E+11 |
| FOP remission | P01009;P01009-2;P01009-3      | Alpha-1-antitrypsin;Short peptide from AAT                       | SERPINA1          | 27  | 1.09E+11 |
| FOP remission | C9JEU5;P02679-2;C9JC84;P0267  | Fibrinogen gamma chain                                           | FGG               | 21  | 8.95E+10 |
| FOP remission | P00738;J3QLC9;A0A0C4DGL8;J3C  | Haptoglobin;Haptoglobin alpha chain;Haptoglobin beta chain       | HP                | 20  | 7.27E+10 |
| FOP remission | P04114;A8MUN2;ENSEMBL:ENS     | Apolipoprotein B-100;Apolipoprotein B-48                         | APOB              | 185 | 6.04E+10 |
| FOP remission | A0A0A0MS08;P01857;A0A0A0M     | Ig gamma-1 chain C region                                        | IGHG1             | 13  | 5.57E+10 |
| FOP remission | P02790;Q9BS19                 | Hemopexin                                                        | HPX               | 21  | 4.53E+10 |
| FOP remission | P02787;H7C5E8;C9JVG0;C9JB55;  | Serotransferrin                                                  | TF                | 41  | 3.85E+10 |
| FOP remission | P01011;G3V3A0;A0A087WY93      | Alpha-1-antichymotrypsin;Alpha-1-antichymotrypsin His-Pro-le     | SERPINA3          | 18  | 2.31E+10 |
| FOP remission | P01876                        | Ig alpha-1 chain C region                                        | IGHA1             | 11  | 2.28E+10 |
| FOP remission | P00450;E9PFZ2;H7C5R1;D6RE86   | Ceruloplasmin                                                    | CP                | 38  | 2.15E+10 |
| FOP remission | A0A140TA29;A0A0G2JL54;F5GXS   | C4a anaphylatoxin                                                | C4B               | 60  | 2.15E+10 |
| FOP remission | P68871;F8W6P5;A0A0J9YWK4      | Hemoglobin subunit beta;LVV-hemorphin-7;Spinorphin               | HBB               | 12  | 1.84E+10 |
| FOP remission | P60709;G5E9R0;E7EVS6;P63267-  | Actin, cytoplasmic 1;Actin, cytoplasmic 1, N-terminally processe | ACTB              | 20  | 1.71E+10 |
| FOP remission | P02751-5;P02751-17;P02751-3;P | Fibronectin;Anastellin;Ugl-Y1;Ugl-Y2;Ugl-Y3                      | FN1               | 36  | 1.63E+10 |
| FOP remission | P01834;A0A075B6H6             | Ig kappa chain C region                                          | IGKC              | 10  | 1.44E+10 |
| FOP remission | Q14624                        | Inter-alpha-trypsin inhibitor heavy chain H4;70 kDa inter-alpha- | ITIH4             | 28  | 1.36E+10 |
| FOP remission | A0A075B6L0;A0A075B6K9;POCG    | Ig lambda-2 chain C regions;Ig lambda-3 chain C regions;Ig lamb  | IGLC3;IGLC2;IGLC6 | 5   | 1.34E+10 |
| FOP remission | P04217;P04217-2;M0R009;Q2KJ   | Alpha-1B-glycoprotein                                            | A1BG              | 18  | 1.12E+10 |
| FOP remission | P08603;A0A0D9SG88;P08603-2;   | Complement factor H                                              | CFH               | 20  | 1.12E+10 |
| FOP remission | P04004;H0YJW9;Q3ZBS7          | Vitronectin;Vitronectin V65 subunit;Vitronectin V10 subunit;So   | VTN               | 13  | 1.08E+10 |
| FOP remission | P06727;Q32PJ2                 | Apolipoprotein A-IV                                              | APOA4             | 34  | 1.06E+10 |
| FOP remission | P01780;A0A0B4J1V1;P01763;P01  | Ig heavy chain V-III region JON                                  |                   | 4   | 1.05E+10 |
| FOP remission | Q5T985;P19823;Q5T987;Q9TRI1   | Inter-alpha-trypsin inhibitor heavy chain H2                     | ITIH2             | 20  | 1.04E+10 |
| FOP remission | P01008;Q8TCE1;P41361          | Antithrombin-III                                                 | SERPINC1          | 18  | 1.03E+10 |
| FOP remission | P10909-4;P10909;P10909-5;P109 | Clusterin;Clusterin beta chain;Clusterin alpha chain;Clusterin   | CLU               | 15  | 8.84E+09 |
| FOP remission | P19827;P19827-2;F8WAS2;P198   | Inter-alpha-trypsin inhibitor heavy chain H1                     | ITIH1             | 16  | 7.74E+09 |
| FOP remission | E7ETN3;B4E1Z4;P00751;H7C5H1   | Complement factor B;Complement factor B Ba fragment;Comp         | CFB               | 22  | 7.64E+09 |
| FOP remission | P02763                        | Alpha-1-acid glycoprotein 1                                      | ORM1              | 5   | 7.28E+09 |
| FOP remission | E9PGN7;P05155-2;P05155;P0515  | Plasma protease C1 inhibitor                                     | SERPING1          | 17  | 7.28E+09 |
| FOP remission | P01042                        | Kininogen-1;Kininogen-1 heavy chain;T-kinin;Bradykinin;Lysyl-b   | KNG1              | 10  | 6.89E+09 |
| FOP remission | P00747;Q5TEH5;A6PVI2;Q15195   | Plasminogen;Plasmin heavy chain A;Activation peptide;Angiosta    | PLG               | 10  | 6.26E+09 |

|               |                              |                                                                    |                   |    |          |
|---------------|------------------------------|--------------------------------------------------------------------|-------------------|----|----------|
| FOP remission | P02747                       | Complement C1q subcomponent subunit C                              | C1QC              | 5  | 5.85E+09 |
| FOP remission | B0YIW2;P02656                | Apolipoprotein C-III                                               | APOC3             | 6  | 5.79E+09 |
| FOP remission | P01031;Q1A7A4                | Complement C5;Complement C5 beta chain;Complement C5 al            | C5                | 35 | 5.7E+09  |
| FOP remission | P05546;ENSEMBL:ENSBTAP0000   | Heparin cofactor 2                                                 | SERPIND1          | 17 | 5.6E+09  |
| FOP remission | P02649;H0Y7L5;E9PEV4;E7ERP7; | Apolipoprotein E                                                   | APOE              | 16 | 5.46E+09 |
| FOP remission | P06396;A0A0A0MS51;A0A0A0M    | Gelsolin                                                           | GSN               | 17 | 4.92E+09 |
| FOP remission | A0A075B6N8;P01860            | Ig gamma-3 chain C region                                          | IGHG3             | 12 | 4.18E+09 |
| FOP remission | A0A075B6K5;P80748            | Immunoglobulin lambda variable 3-9                                 | IGLV3-9           | 3  | 4.09E+09 |
| FOP remission | S4R460;A0A0B4J2B5            | Immunoglobulin heavy variable 3/OR16-9 (non-functional) ; Im       | IGHV3OR16-9       | 2  | 3.69E+09 |
| FOP remission | P00734;E9PIT3;C9JV37;P00735  | Prothrombin;Activation peptide fragment 1;Activation peptide       | F2                | 13 | 3.6E+09  |
| FOP remission | V9GYE3;V9GYG9;V9GYM3;P0265   | Apolipoprotein A-II;Proapolipoprotein A-II;Truncated apolipoppr    | APOA2             | 3  | 3.53E+09 |
| FOP remission | D6RF35;D6RF20;D6RBJ7         | D6RF35                                                             | GC                | 6  | 3.43E+09 |
| FOP remission | P27169;F8WF42                | Serum paraoxonase/arylesterase 1                                   | PON1              | 10 | 3.36E+09 |
| FOP remission | P02730;P02730-2;A0A0A0MS98   | Band 3 anion transport protein                                     | SLC4A1            | 19 | 3.36E+09 |
| FOP remission | P02750                       | Leucine-rich alpha-2-glycoprotein                                  | LRG1              | 10 | 3.35E+09 |
| FOP remission | A0A0B4J1X5;A0A075B7E8;A0A0J  | Immunoglobulin heavy variable 3-74                                 | IGHV3-74;IGHV3OR  | 2  | 3.06E+09 |
| FOP remission | P01624                       | Ig kappa chain V-III region POM                                    |                   | 2  | 2.92E+09 |
| FOP remission | P02766;A0A087WV45;A0A087W    | Transthyretin                                                      | TTR               | 9  | 2.91E+09 |
| FOP remission | A0A0A0MRZ8;P04433            | Ig kappa chain V-III region VG                                     | IGKV3D-11         | 1  | 2.9E+09  |
| FOP remission | P02748;Q3MHN2                | Complement component C9;Complement component C9a;Com               | C9                | 11 | 2.79E+09 |
| FOP remission | P00739;P00739-2;A0A0A0MRD9   | Haptoglobin-related protein                                        | HPR               | 13 | 2.67E+09 |
| FOP remission | P01619                       | Ig kappa chain V-III region B6                                     |                   | 1  | 2.58E+09 |
| FOP remission | A0A087X0Q4;A0A075B6P5;A0A0   | Ig kappa chain V-II region FR;Ig kappa chain V-II region Cum       | IGKV2-40;IGKV2D-2 | 2  | 2.52E+09 |
| FOP remission | A0A087X232;P09871;F8WCZ6;H0  | Complement C1s subcomponent;Complement C1s subcompon               | C1S               | 10 | 2.5E+09  |
| FOP remission | P07225;G5E9F8;H7BXT0;P07224  | Vitamin K-dependent protein S                                      |                   | 10 | 2.45E+09 |
| FOP remission | Q60FE5;P21333-2;P21333;Q5HY  | Filamin-A                                                          | FLNA              | 36 | 2.4E+09  |
| FOP remission | P01019                       | Angiotensinogen;Angiotensin-1;Angiotensin-2;Angiotensin-3;Ar       | AGT               | 10 | 1.95E+09 |
| FOP remission | Q9Y490;H0YMT1;A0A1C7CYV7;A   | Talin-1                                                            | TLN1              | 29 | 1.86E+09 |
| FOP remission | P51884;Q05443                | Lumican                                                            | LUM               | 7  | 1.84E+09 |
| FOP remission | P08514;P08514-3;P08514-2     | Integrin alpha-IIb;Integrin alpha-IIb heavy chain;Integrin alpha-I | ITGA2B            | 15 | 1.84E+09 |
| FOP remission | P20742;P20742-2              | Pregnancy zone protein                                             | PZP               | 25 | 1.73E+09 |
| FOP remission | A0A0B4J1Y9;A0A075B7D8        | Immunoglobulin heavy variable 3-72                                 | IGHV3-72          | 4  | 1.7E+09  |
| FOP remission | A0A0B4J1U7                   | Immunoglobulin heavy variable 6-1                                  | IGHV6-1           | 1  | 1.64E+09 |

|               |                                |                                                                   |            |    |          |
|---------------|--------------------------------|-------------------------------------------------------------------|------------|----|----------|
| FOP remission | P02745;X6RLJ0                  | Complement C1q subcomponent subunit A                             | C1QA       | 3  | 1.6E+09  |
| FOP remission | P08697-2;P08697;A0A0G2JPA8;C   | Alpha-2-antiplasmin                                               | SERPINF2   | 12 | 1.6E+09  |
| FOP remission | K7ERI9;P02654;K7EKP1;K7EJ19;K  | Apolipoprotein C-I;Truncated apolipoprotein C-I                   | APOC1      | 4  | 1.57E+09 |
| FOP remission | P06312                         | Ig kappa chain V-IV region                                        | IGKV4-1    | 3  | 1.57E+09 |
| FOP remission | O14791-3;O14791;O14791-2;B1A   | Apolipoprotein L1                                                 | APOL1      | 8  | 1.37E+09 |
| FOP remission | A0A0C4DH39                     | Immunoglobulin heavy variable 1-58                                | IGHV1-58   | 1  | 1.29E+09 |
| FOP remission | P01700;P01699                  | Ig lambda chain V-I region HA;Ig lambda chain V-I region VOR      |            | 3  | 1.26E+09 |
| FOP remission | P06310;A0A075B6S6              | Ig kappa chain V-II region RPMI 6410                              | IGKV2D-30  | 3  | 1.26E+09 |
| FOP remission | O43866                         | CD5 antigen-like                                                  | CD5L       | 2  | 1.24E+09 |
| FOP remission | Q5SRP5;O95445-2;O95445         | Apolipoprotein M                                                  | APOM       | 2  | 1.15E+09 |
| FOP remission | A6NMB1                         | Sialic acid-binding Ig-like lectin 16                             | SIGLEC16   | 1  | 1.11E+09 |
| FOP remission | O75636-2;O75636                | Ficolin-3                                                         | FCN3       | 3  | 1.08E+09 |
| FOP remission | A0A0A0MSV6;D6R934;P02746;D     | Complement C1q subcomponent subunit B                             | C1QB       | 6  | 1.06E+09 |
| FOP remission | P36955;I3L4N7;I3L4F9;I3L107;Q9 | Pigment epithelium-derived factor                                 | SERPINF1   | 10 | 1.04E+09 |
| FOP remission | Q06033-2;Q06033;A0A087WW4      | Inter-alpha-trypsin inhibitor heavy chain H3                      | ITIH3      | 12 | 1.03E+09 |
| FOP remission | P35579;P35579-2;P35580;P3558   | Myosin-9                                                          | MYH9       | 31 | 1.03E+09 |
| FOP remission | Q96PD5;Q96PD5-2;ENSEMBL:EN     | N-acetylmuramoyl-L-alanine amidase                                | PGLYRP2    | 10 | 1.01E+09 |
| FOP remission | P02786;G3V0E5;H7C3V5;F8WBE     | Transferrin receptor protein 1;Transferrin receptor protein 1, se | TFRC       | 15 | 1E+09    |
| FOP remission | P01042-2;P01042-3;P01045-1;Q   | Kininogen-1;Kininogen-1 heavy chain;T-kinin;Bradykinin;Lysyl-b    | KNG1       | 10 | 9.83E+08 |
| FOP remission | C9JF17;P05090;C9JX71           | Apolipoprotein D                                                  | APOD       | 7  | 9.7E+08  |
| FOP remission | C9JV77;P02765                  | Alpha-2-HS-glycoprotein;Alpha-2-HS-glycoprotein chain A;Alpha     | AHSG       | 3  | 9.63E+08 |
| FOP remission | Q86UX7-2;Q86UX7;F5H1C6;HOYF    | Fermitin family homolog 3                                         | FERMT3     | 14 | 9.45E+08 |
| FOP remission | HOYAC1;P03952;E9PBC5           | Plasma kallikrein;Plasma kallikrein heavy chain;Plasma kallikrein | KLKB1      | 5  | 8.91E+08 |
| FOP remission | P08185;G3V4V7;G3V350           | Corticosteroid-binding globulin                                   | SERPINA6   | 5  | 8.84E+08 |
| FOP remission | P63104;E7EX29;E7ESK7;B0AZS6;   | 14-3-3 protein zeta/delta                                         | YWHAZ      | 8  | 8.68E+08 |
| FOP remission | P26038;E7EQR4;P35241;P15311    | Moesin                                                            | MSN        | 9  | 8.58E+08 |
| FOP remission | D6RD17;P01591;C9JA05;D6RHJ6    | Immunoglobulin J chain                                            | JCHAIN;IGJ | 3  | 8.34E+08 |
| FOP remission | P0DJ18;E9PQD6;E9PR14;G3V1D9    | Serum amyloid A-1 protein;Amyloid protein A;Serum amyloid p       | SAA1       | 5  | 8E+08    |
| FOP remission | P22792                         | Carboxypeptidase N subunit 2                                      | CPN2       | 7  | 7.8E+08  |
| FOP remission | P02743                         | Serum amyloid P-component;Serum amyloid P-component(1-2           | APCS       | 7  | 7.69E+08 |
| FOP remission | P04196                         | Histidine-rich glycoprotein                                       | HRG        | 10 | 7.58E+08 |
| FOP remission | P04003;F2Z2V7;A6PVY5           | C4b-binding protein alpha chain                                   | C4BPA      | 4  | 7.29E+08 |
| FOP remission | P01859                         | Ig gamma-2 chain C region                                         | IGHG2      | 9  | 7.2E+08  |

|               |                               |                                                                   |                   |    |          |
|---------------|-------------------------------|-------------------------------------------------------------------|-------------------|----|----------|
| FOP remission | A0A0C4DH68;A0A075B6R9         | Immunoglobulin kappa variable 2-24                                | IGKV2-24;IGKV2D-2 | 3  | 6.99E+08 |
| FOP remission | A0A024R6I7;A0A0G2JRN3;G3V2E   | Alpha-1-antitrypsin                                               | SERPINA1          | 27 | 6.88E+08 |
| FOP remission | A0A0C4DH43;A0A0J9YVU5         | Immunoglobulin heavy variable 2-70D                               |                   | 2  | 6.49E+08 |
| FOP remission | A0A024R0T9;K7ER74;P02655;Q6   | Apolipoprotein C-II;Proapolipoprotein C-II                        | APOC2;APOC4-APO   | 3  | 6.49E+08 |
| FOP remission | P29622                        | Kallistatin                                                       | SERPINA4          | 8  | 6.27E+08 |
| FOP remission | P43652;REFSEQ:XP_585019       | Afamin                                                            | AFM               | 4  | 6.19E+08 |
| FOP remission | P05106;I3L4X8;H3BM21;P05106   | Integrin beta-3;Integrin beta                                     | ITGB3             | 4  | 5.69E+08 |
| FOP remission | Q08380;K7EP36;K7EJY8;K7ESM3   | Galectin-3-binding protein                                        | LGALS3BP          | 8  | 5.65E+08 |
| FOP remission | P05543;Q9TT36                 | Thyroxine-binding globulin                                        | SERPINA7          | 5  | 5.63E+08 |
| FOP remission | P10643;Q29RQ1                 | Complement component C7                                           | C7                | 7  | 5.58E+08 |
| FOP remission | P35858;P35858-2               | Insulin-like growth factor-binding protein complex acid labile su | IGFALS            | 13 | 5.53E+08 |
| FOP remission | P01861                        | Ig gamma-4 chain C region                                         | IGHG4             | 7  | 5.49E+08 |
| FOP remission | A0A0A0MRJ7;P12259             | Coagulation factor V;Coagulation factor V heavy chain;Coagulat    | F5                | 12 | 5.22E+08 |
| FOP remission | A0A075B6J9                    | Immunoglobulin lambda variable 2-18                               | IGLV2-18          | 2  | 5.22E+08 |
| FOP remission | A0A0C4DH25                    | Immunoglobulin kappa variable 3D-20                               | IGKV3D-20         | 1  | 5.05E+08 |
| FOP remission | A0A075B7D0                    | Immunoglobulin heavy variable 1/OR15-1 (non-functional)           | IGHV1OR15-1       | 1  | 5.01E+08 |
| FOP remission | P15169;B1AP58;Q2KJ83          | Carboxypeptidase N catalytic chain                                | CPN1              | 6  | 4.98E+08 |
| FOP remission | P13671                        | Complement component C6                                           | C6                | 3  | 4.82E+08 |
| FOP remission | P27105;F8VSL7;P27105-2        | Erythrocyte band 7 integral membrane protein                      | STOM              | 6  | 4.67E+08 |
| FOP remission | P07360;Q5SQ08                 | Complement component C8 gamma chain                               | C8G               | 4  | 4.65E+08 |
| FOP remission | P18428                        | Lipopolysaccharide-binding protein                                | LBP               | 8  | 4.61E+08 |
| FOP remission | P01599                        | Ig kappa chain V-I region Gal                                     |                   | 4  | 4.53E+08 |
| FOP remission | P11166;A6NL68;A0A0D9SG74;A0   | Solute carrier family 2, facilitated glucose transporter member   | SLC2A1            | 4  | 4.45E+08 |
| FOP remission | F5GY80;F5H7G1;P07358          | Complement component C8 beta chain                                | C8B               | 10 | 4.41E+08 |
| FOP remission | P07357                        | Complement component C8 alpha chain                               | C8A               | 4  | 4.3E+08  |
| FOP remission | A0A096LPE2;P35542             | Serum amyloid A-4 protein                                         | SAA2-SAA4;SAA4    | 6  | 4.22E+08 |
| FOP remission | P11277-3;P11277;P11277-2;H0Y  | Spectrin beta chain, erythrocytic                                 | SPTB              | 21 | 4.19E+08 |
| FOP remission | G3XAM2;E7ETH0;P05156;D6R9Z    | Complement factor I;Complement factor I heavy chain;Comple        | CFI               | 5  | 4.14E+08 |
| FOP remission | P13224;P13224-2               | Platelet glycoprotein Ib beta chain                               | GP1BB             | 2  | 4.05E+08 |
| FOP remission | P02549-2;P02549;V9GY79        | Spectrin alpha chain, erythrocytic 1                              | SPTA1             | 20 | 3.93E+08 |
| FOP remission | E9PP50;P23528;E9PLJ3;E9PS23;E | Cofilin-1;Cofilin-2                                               | CFL1;CFL2         | 2  | 3.93E+08 |
| FOP remission | A0A0G2JPRO;A0A140TA49;P0103   | C4a anaphylatoxin                                                 | C4A               | 59 | 3.78E+08 |
| FOP remission | P04275                        | von Willebrand factor;von Willebrand antigen 2                    | VWF               | 8  | 3.77E+08 |

|               |                               |                                                                     |                   |    |          |
|---------------|-------------------------------|---------------------------------------------------------------------|-------------------|----|----------|
| FOP remission | P00488;Q9NQP5;A6PVK5          | Coagulation factor XIII A chain                                     | F13A1             | 7  | 3.72E+08 |
| FOP remission | P19652                        | Alpha-1-acid glycoprotein 2                                         | ORM2              | 4  | 3.68E+08 |
| FOP remission | A0A075B6I9;P04211             | Ig lambda chain V region 4A                                         | IGLV7-46          | 1  | 3.52E+08 |
| FOP remission | P07737;K7EJ44;I3L3D5;P02584   | Profilin-1                                                          | PFN1              | 7  | 3.41E+08 |
| FOP remission | Q8WWZ8;Q8WWZ8-2               | Oncoprotein-induced transcript 3 protein                            | OIT3              | 2  | 3.39E+08 |
| FOP remission | A0A087X1J7;P22352;HOYBE4;E5F  | Glutathione peroxidase;Glutathione peroxidase 3                     | GPX3              | 6  | 3.33E+08 |
| FOP remission | P04899;P04899-4;P04899-6;P044 | Guanine nucleotide-binding protein G(i) subunit alpha-2             | GNAI2             | 5  | 3.32E+08 |
| FOP remission | P06753-4;P06753-3;P06753-6;P0 | Tropomyosin alpha-3 chain                                           | TPM3;DKFZp686J13  | 7  | 3.29E+08 |
| FOP remission | P02775                        | Platelet basic protein;Connective tissue-activating peptide III;TC  | PPBP              | 3  | 3.23E+08 |
| FOP remission | P16157-11;P16157-9;P16157-6;P | Ankyrin-1                                                           | ANK1              | 15 | 3.04E+08 |
| FOP remission | A6NNI4;G8JLH6;P21926;F5GXT1;  | Tetraspanin;CD9 antigen                                             | CD9               | 1  | 3.03E+08 |
| FOP remission | B4DPQ0;P00736;F5H2D0;F5H1V0   | Complement C1r subcomponent;Complement C1r subcomponent             | C1R               | 7  | 2.82E+08 |
| FOP remission | P16452-3;P16452;P16452-2;H3B  | Erythrocyte membrane protein band 4.2                               | EPB42             | 4  | 2.69E+08 |
| FOP remission | E9PKE3;P11142;P11142-2;E9PN8  | Heat shock cognate 71 kDa protein;Heat shock-related 70 kDa p       | HSPA8;HSPA2       | 7  | 2.66E+08 |
| FOP remission | P02776;P10720                 | Platelet factor 4;Platelet factor 4, short form;Platelet factor 4 v | PF4;PF4V1         | 1  | 2.62E+08 |
| FOP remission | P49454                        | Centromere protein F                                                | CENPF             | 1  | 2.54E+08 |
| FOP remission | P00740-2;P00740               | Coagulation factor IX;Coagulation factor IXa light chain;Coagula    | F9                | 3  | 2.5E+08  |
| FOP remission | P01594;P01593                 | Ig kappa chain V-I region AU;Ig kappa chain V-I region AG           |                   | 1  | 2.47E+08 |
| FOP remission | F8VPF3;F8W1R7;J3KND3;G8JLA2   | Myosin light polypeptide 6;Myosin light chain 6B                    | MYL6;MYL6B        | 3  | 2.34E+08 |
| FOP remission | A0A0A0MS15                    | Immunoglobulin heavy variable 3-49                                  | IGHV3-49          | 2  | 2.25E+08 |
| FOP remission | P06331;A0A0J9YWU9;A0A0C4DH    | Ig heavy chain V-II region ARH-77;Ig heavy chain V-II region NEV    | IGHV4-61          | 2  | 2.25E+08 |
| FOP remission | A0A0C4DH42;A0A0J9YVT0;P0176   | Ig heavy chain V-III region BUT;Ig heavy chain V-III region KOL;Ig  | IGHV3-66;IGHV3-23 | 2  | 2.25E+08 |
| FOP remission | S4R3Y4;P02760;S4R471          | Protein AMBP;Alpha-1-microglobulin;Inter-alpha-trypsin inhibit      | AMBP              | 1  | 2.16E+08 |
| FOP remission | A0A075B6S2;A0A0A0MRZ7         | Immunoglobulin kappa variable 2D-26                                 | IGKV2D-29;IGKV2D- | 3  | 2.12E+08 |
| FOP remission | P18206-2;P18206;Q5JQ13;P1820  | Vinculin                                                            | VCL               | 6  | 1.86E+08 |
| FOP remission | P32119;A6NIW5;P32119-2        | Peroxiredoxin-2                                                     | PRDX2             | 4  | 1.82E+08 |
| FOP remission | A0A0C4DH38                    | Immunoglobulin heavy variable 5-51                                  | IGHV5-51          | 3  | 1.8E+08  |
| FOP remission | F5H5D3;Q71U36-2;Q9BQE3;Q71    | Tubulin alpha-1A chain;Tubulin alpha-1C chain;Tubulin alpha-1B      | TUBA1C;TUBA1A;TU  | 4  | 1.78E+08 |
| FOP remission | Q5SRN7;A0A0G2JI36;Q5SRN5;A0   | HLA class I histocompatibility antigen, A-36 alpha chain;HLA clas   | HLA-A;HLA-H;HLA-C | 4  | 1.77E+08 |
| FOP remission | A0A075B6K8;A0A0B4J231;POCG0   | Ig lambda-1 chain C regions;Immunoglobulin lambda-like polyp        | IGLC1;IGLL5       | 3  | 1.76E+08 |
| FOP remission | G3V2W1;Q9UK55                 | Protein Z-dependent protease inhibitor                              | SERPINA10         | 5  | 1.58E+08 |
| FOP remission | A0A087WSY6                    | Immunoglobulin kappa variable 3D-15                                 | IGKV3D-15         | 2  | 1.57E+08 |
| FOP remission | P01701                        | Ig lambda chain V-I region NEW                                      |                   | 1  | 1.54E+08 |



|               |                              |                                                                  |               |    |          |
|---------------|------------------------------|------------------------------------------------------------------|---------------|----|----------|
| FOP remission | H7BXE3;Q9NWH9;H0YLN7;H0YN    | SAFB-like transcription modulator                                | SLTM          | 2  | 1.51E+08 |
| FOP remission | A0A0G2JMB2;P01877;A0A075B6   | Ig alpha-2 chain C region                                        | IGHA2         | 9  | 1.51E+08 |
| FOP remission | P43251-4;P43251;P43251-3;P43 | Biotinidase                                                      | BTD           | 3  | 1.49E+08 |
| FOP remission | P14618-2;P14618;H3BQ34;H3BT  | Pyruvate kinase PKM;Pyruvate kinase                              | PKM           | 5  | 1.48E+08 |
| FOP remission | Q9H4B7                       | Tubulin beta-1 chain                                             | TUBB1         | 6  | 1.48E+08 |
| FOP remission | P67936;P67936-2;K7EQW8;K7EP  | Tropomyosin alpha-4 chain                                        | TPM4          | 4  | 1.44E+08 |
| FOP remission | A0A075B6I0                   | Immunoglobulin lambda variable 8-61                              | IGLV8-61      | 1  | 1.4E+08  |
| FOP remission | Q16610;Q16610-4;Q16610-3;Q1  | Extracellular matrix protein 1                                   | ECM1          | 3  | 1.39E+08 |
| FOP remission | E7EUT5;P04406-2;P04406       | Glyceraldehyde-3-phosphate dehydrogenase                         | GAPDH         | 2  | 1.39E+08 |
| FOP remission | P15924-2;P15924-3;P15924     | Desmoplakin                                                      | DSP           | 2  | 1.32E+08 |
| FOP remission | O75882-3;O75882-2;O75882     | Attractin                                                        | ATRN          | 4  | 1.32E+08 |
| FOP remission | P02741;C9JRE9;Q5VVP7;P02741  | C-reactive protein;C-reactive protein(1-205)                     | CRP           | 2  | 1.31E+08 |
| FOP remission | A0A0C4DH24                   | Immunoglobulin kappa variable 6-21                               | IGKV6-21      | 1  | 1.3E+08  |
| FOP remission | P00748                       | Coagulation factor XII;Coagulation factor XIIa heavy chain;Beta- | F12           | 1  | 1.24E+08 |
| FOP remission | P80108                       | Phosphatidylinositol-glycan-specific phospholipase D             | GPLD1         | 5  | 1.24E+08 |
| FOP remission | P06733-2;P06733;K7EM90       | Alpha-enolase;Enolase                                            | ENO1          | 2  | 1.22E+08 |
| FOP remission | A0A087WZB5;Q9HBI1-3;Q9HBI1   | Beta-parvin                                                      | PARVB         | 3  | 1.19E+08 |
| FOP remission | B4DQ11;A0A0G2JL69;P06681-3;P | Complement C2;Complement C2b fragment;Complement C2a f           | C2            | 9  | 1.19E+08 |
| FOP remission | E9PHK0;P05452;Q2KIS7         | Tetranectin                                                      | CLEC3B        | 3  | 1.13E+08 |
| FOP remission | P61224-2;P61224-3;P61224;A0A | Ras-related protein Rap-1b;Ras-related protein Rap-1A;Ras-rela   | RAP1B;RAP1A   | 5  | 1.12E+08 |
| FOP remission | F8VV32;A0A0B4J259;P61626     | Lysozyme;Lysozyme C                                              | LYZ           | 1  | 1.12E+08 |
| FOP remission | F8WF14;P06276;H7C4Y0;H0Y885  | Carboxylic ester hydrolase;Cholinesterase                        | BCHE          | 4  | 1.09E+08 |
| FOP remission | A0A087WSY5;Q96IY4            | Carboxypeptidase B2                                              | CPB2          | 1  | 1.08E+08 |
| FOP remission | P62805                       | Histone H4                                                       | HIST1H4A      | 5  | 1.03E+08 |
| FOP remission | P00742                       | Coagulation factor X;Factor X light chain;Factor X heavy chain;A | F10           | 2  | 1.01E+08 |
| FOP remission | A0A087WUS7;A0A0A0MS09;P01    | Ig delta chain C region                                          | IGHD          | 2  | 98989000 |
| FOP remission | J3QSE5;P04180;I3L1Q6;J3QKT0  | Phosphatidylcholine-sterol acyltransferase                       | LCAT          | 1  | 98438000 |
| FOP remission | P01721                       | Ig lambda chain V-VI region AR                                   |               | 2  | 97609000 |
| FOP remission | F6X3N5;F6UT28;P62873-2;P6287 | Guanine nucleotide-binding protein G(I)/G(S)/G(T) subunit beta   | GNB1          | 5  | 96156000 |
| FOP remission | H0Y755;M9MML0;P08637;C9JC7   | Low affinity immunoglobulin gamma Fc region receptor III-A;Lo    | FCGR3A;FCGR3B | 2  | 95423000 |
| FOP remission | P63000;P63000-2              | Ras-related C3 botulinum toxin substrate 1                       | RAC1          | 3  | 93307000 |
| FOP remission | P06396-2;Q5T0I0              | Gelsolin                                                         | GSN           | 17 | 92200000 |
| FOP remission | P14770                       | Platelet glycoprotein IX                                         | GP9           | 2  | 90435000 |

|               |                               |                                                                     |                   |    |          |
|---------------|-------------------------------|---------------------------------------------------------------------|-------------------|----|----------|
| FOP remission | A0A0C4DH31                    | Immunoglobulin heavy variable 1-18                                  | IGHV1-18          | 1  | 90258000 |
| FOP remission | P06702                        | Protein S100-A9                                                     | S100A9            | 1  | 88789000 |
| FOP remission | P02749;J3QRN2;J3KS17;J3QLI0;P | Beta-2-glycoprotein 1                                               | APOH              | 3  | 87456000 |
| FOP remission | P01703                        | Ig lambda chain V-I region NEWM                                     |                   | 1  | 80194000 |
| FOP remission | P03951-2;P03951;X6R3B1;D6RB3  | Coagulation factor XI;Coagulation factor XIa heavy chain;Coagu      | F11               | 2  | 78982000 |
| FOP remission | C9JB90;C9JU14;J3KR73;P20340-4 | Ras-related protein Rab-6A;Ras-related protein Rab-6B;Ras-rela      | RAB6B;RAB6A;RAB3  | 1  | 76915000 |
| FOP remission | P01743                        | Ig heavy chain V-I region HG3                                       |                   | 1  | 76521000 |
| FOP remission | A0A0C4DH72;A0A0C4DH73;P044    | Immunoglobulin kappa variable 1-6                                   | IGKV1-6           | 3  | 73336000 |
| FOP remission | P62937;F8WE65;C9J5S7;P62937-  | Peptidyl-prolyl cis-trans isomerase A;Peptidyl-prolyl cis-trans iso | PPIA              | 3  | 72843000 |
| FOP remission | J3KQ66;P78509-3;P78509-2;P78  | Reelin                                                              | RELN              | 5  | 72583000 |
| FOP remission | A0A0C4DH36                    | Probable non-functional immunoglobulin heavy variable 3-38          | IGHV3-38          | 1  | 71408000 |
| FOP remission | P48059;F8WB59;A0A0J9YYC1;A0   | LIM and senescent cell antigen-like-containing domain protein 1     | LIMS1             | 2  | 68412000 |
| FOP remission | P04430                        | Ig kappa chain V-I region BAN                                       |                   | 1  | 68179000 |
| FOP remission | A0A0A0MTH3;Q13418-3;Q13418    | Integrin-linked protein kinase                                      | ILK               | 2  | 67679000 |
| FOP remission | Q13790                        | Apolipoprotein F                                                    | APOF              | 1  | 66917000 |
| FOP remission | E7EU05;P16671-4;P16671-3;P16  | Platelet glycoprotein 4                                             | CD36              | 1  | 65344000 |
| FOP remission | P05154;G3V264;G3V2M1;G3V5C    | Plasma serine protease inhibitor                                    | SERPINA5          | 3  | 64189000 |
| FOP remission | K7ERX7;K7EK77;P25705-2;P2570  | ATP synthase subunit alpha, mitochondrial                           | ATP5A1            | 4  | 62005000 |
| FOP remission | B7ZKJ8;Q14624-3;Q14624-2;Q14  | Inter-alpha-trypsin inhibitor heavy chain H4;70 kDa inter-alpha-    | ITIH4             | 28 | 60504000 |
| FOP remission | P08493;P08493-2               | Matrix Gla protein                                                  | MGP               | 1  | 57920000 |
| FOP remission | P23083                        | Ig heavy chain V-I region V35                                       |                   | 1  | 56765000 |
| FOP remission | P09172                        | Dopamine beta-hydroxylase;Soluble dopamine beta-hydroxylas          | DBH               | 3  | 56102000 |
| FOP remission | A0A0A0MT36;A0A0C4DH26         | Immunoglobulin kappa variable 6D-21                                 | IGKV6D-21;IGKV6D- | 1  | 53820000 |
| FOP remission | P08519                        | Apolipoprotein(a)                                                   | LPA               | 3  | 53774000 |
| FOP remission | P01704                        | Ig lambda chain V-II region TOG                                     |                   | 1  | 53174000 |
| FOP remission | X6R433;A0A0A0MT22;P08575-2;   | Protein-tyrosine-phosphatase;Receptor-type tyrosine-protein p       | PTPRC             | 2  | 53148000 |
| FOP remission | C9JZN1;C9JIS1;C9JXA5;P62879;E | Guanine nucleotide-binding protein G(I)/G(S)/G(T) subunit beta      | GNB2;GNB4         | 4  | 52281000 |
| FOP remission | A0A140T8W8;A0A140T8Y4;A0A0    | HLA class I histocompatibility antigen, A-66 alpha chain;HLA clas   | HLA-A             | 1  | 52148000 |
| FOP remission | P01705                        | Ig lambda chain V-II region NEI                                     |                   | 1  | 51520000 |
| FOP remission | Q13103                        | Secreted phosphoprotein 24                                          | SPP2              | 1  | 49964000 |
| FOP remission | Q9NZP8;H0YFL7                 | Complement C1r subcomponent-like protein                            | C1RL              | 2  | 49083000 |
| FOP remission | P27348;E9PG15;P31947-2;P3194  | 14-3-3 protein theta;14-3-3 protein sigma                           | YWHAQ;SFN         | 4  | 45894000 |
| FOP remission | H0YH81;P06576;F8W0P7;F8W07    | ATP synthase subunit beta;ATP synthase subunit beta, mitoch         | ATP5B             | 3  | 45869000 |

|               |                                      |                                                                             |                   |    |          |
|---------------|--------------------------------------|-----------------------------------------------------------------------------|-------------------|----|----------|
| FOP remission | Q14520-2;Q14520                      | Hyaluronan-binding protein 2;Hyaluronan-binding protein 2 50                | HABP2             | 1  | 45560000 |
| FOP remission | P05556-2;P05556;P05556-5;P05556-6    | Integrin beta-1                                                             | ITGB1             | 4  | 45459000 |
| FOP remission | P01709                               | Ig lambda chain V-II region MGC                                             |                   | 1  | 45320000 |
| FOP remission | O00391-2;O00391;A8MXT8               | Sulfhydryl oxidase 1                                                        | QSOX1             | 3  | 43474000 |
| FOP remission | A0A075B6H9                           | Immunoglobulin lambda variable 4-69                                         | IGLV4-69          | 2  | 42667000 |
| FOP remission | H9KV75;P12814-2;P12814;P12814-3      | Alpha-actinin-1;Alpha-actinin-4                                             | ACTN1;ACTN4       | 4  | 41083000 |
| FOP remission | E7END6;P04070;P04070-2;H7BY1         | Vitamin K-dependent protein C;Vitamin K-dependent protein C                 | PROC              | 1  | 40195000 |
| FOP remission | P11021                               | 78 kDa glucose-regulated protein                                            | HSPA5             | 2  | 39609000 |
| FOP remission | Q9UEU0-2;Q9UEU0                      | Vesicle transport through interaction with t-SNAREs homolog 1               | VTI1B             | 1  | 39452000 |
| FOP remission | E5RGQ0;Q08495-2;Q08495;A0A007D9E8    | Dematin                                                                     | DMTN              | 1  | 38475000 |
| FOP remission | P62258;P62258-2;B4DJF2;I3L3T1        | 14-3-3 protein epsilon                                                      | YWHAE             | 3  | 38010000 |
| FOP remission | O00299                               | Chloride intracellular channel protein 1                                    | CLIC1             | 1  | 36883000 |
| FOP remission | Q4VB86;P11171-6;P11171-4;P11171-5    | Protein 4.1                                                                 | EPB41             | 2  | 36286000 |
| FOP remission | C9JUG7;F8W9N7;A0A0D9SET8;P00746      | F-actin-capping protein subunit alpha-2;F-actin-capping protein             | CAPZA2;CAPZA1     | 1  | 36004000 |
| FOP remission | K7ERG9;P00746                        | Complement factor D                                                         | CFD               | 1  | 35091000 |
| FOP remission | I3L1J1;B4DYU0;A0A0C4DGN2;I3L1J1      | Sex hormone-binding globulin                                                | SHBG              | 2  | 34632000 |
| FOP remission | O15143                               | Actin-related protein 2/3 complex subunit 1B                                | ARPC1B            | 2  | 34230000 |
| FOP remission | A0A0B4J2D9                           | Immunoglobulin kappa variable 1D-13                                         | IGKV1D-13         | 1  | 34003000 |
| FOP remission | D6RFL4;P08571                        | Monocyte differentiation antigen CD14;Monocyte differentiation antigen CD14 | CD14              | 2  | 33182000 |
| FOP remission | P08238                               | Heat shock protein HSP 90-beta                                              | HSP90AB1          | 2  | 32566000 |
| FOP remission | P14625;F8W026;Q96GW1                 | Endoplasmic reticulum chaperone protein BiP                                 | HSP90B1           | 1  | 32359000 |
| FOP remission | P63261;I3L3I0;I3L1U9;I3L4N8;K7J3KPS3 | Actin, cytoplasmic 2;Actin, cytoplasmic 2, N-terminally processed           | ACTG1             | 20 | 31931000 |
| FOP remission | C9JJV6;C9JZL8;C9J5M0;C9JC07;Q00404   | Myeloid-associated differentiation marker                                   | MYADM             | 1  | 31594000 |
| FOP remission | P04040                               | Catalase                                                                    | CAT               | 4  | 31121000 |
| FOP remission | J3KPS3;P04075;P04075-2;H3BUH         | Fructose-bisphosphate aldolase;Fructose-bisphosphate aldolase               | ALDOA             | 1  | 30136000 |
| FOP remission | F8WDD7;H7C0A3;F8WCF6;A0A007D9E8      | Actin-related protein 2/3 complex subunit 4                                 | ARPC4;ARPC4-TTLL3 | 1  | 28543000 |
| FOP remission | A0A0J9YY99                           | Ig-like domain-containing protein                                           |                   | 3  | 26897000 |
| FOP remission | D6RD66;O75083;O75083-3               | WD repeat-containing protein 1                                              | WDR1              | 2  | 26533000 |
| FOP remission | P01782                               | Ig heavy chain V-III region DOB                                             |                   | 2  | 26527000 |
| FOP remission | J3KRP0;Q96KN2                        | Beta-Ala-His dipeptidase                                                    | CNDP1             | 2  | 26219000 |
| FOP remission | P27797                               | Calreticulin                                                                | CALR              | 1  | 24157000 |
| FOP remission | P30101                               | Protein disulfide-isomerase A3                                              | PDIA3             | 2  | 23881000 |
| FOP remission | C9JIJ3;C9IZH1;C9JC03;A0A024R5        | EH domain-containing protein 3;EH domain-containing protein                 | EHD1;EHD3;EHD2    | 2  | 23589000 |

|               |                               |                                                                    |                    |    |          |
|---------------|-------------------------------|--------------------------------------------------------------------|--------------------|----|----------|
| FOP remission | P23229-4;P23229-2;P23229-5;P2 | Integrin alpha-6;Integrin alpha-6 heavy chain;Integrin alpha-6 lig | ITGA6              | 2  | 23441000 |
| FOP remission | P12236;P05141                 | ADP/ATP translocase 3;ADP/ATP translocase 3, N-terminally pro      | SLC25A6;SLC25A5    | 1  | 21869000 |
| FOP remission | P08567                        | Pleckstrin                                                         | PLEK               | 1  | 21659000 |
| FOP remission | A0A075B7B8                    | Immunoglobulin heavy variable 3/OR16-12 (non-functional)           | IGHV3OR16-12       | 2  | 19581000 |
| FOP remission | Q5VZR0;Q9H4G4                 | Golgi-associated plant pathogenesis-related protein 1              | GLIPR2             | 1  | 19556000 |
| FOP remission | A0A0C4DH67;A0A0C4DH69;A0A0    | Immunoglobulin kappa variable 1-8                                  | IGKV1-8;IGKV1-9;IG | 1  | 19279000 |
| FOP remission | H0YN42;P07355;P07355-2;H0YM   | Annexin;Annexin A2;Putative annexin A2-like protein                | ANXA2;ANXA2P2      | 1  | 19195000 |
| FOP remission | K7ES02;Q13867;J3KS79;K7ENH5;  | Bleomycin hydrolase                                                | BLMH               | 2  | 19045000 |
| FOP remission | F8WE04;P04792                 | Heat shock protein beta-1                                          | HSPB1              | 1  | 18882000 |
| FOP remission | E7EPG1;Q13201;Q13201-2        | Multimerin-1;Platelet glycoprotein Ia*;155 kDa platelet multimer   | MMRN1              | 2  | 17691000 |
| FOP remission | P30740                        | Leukocyte elastase inhibitor                                       | SERPINB1           | 1  | 16930000 |
| FOP remission | P55058;P55058-3;P55058-4;P550 | Phospholipid transfer protein                                      | PLTP               | 2  | 16547000 |
| FOP remission | P31146;H3BRY3                 | Coronin-1A;Coronin                                                 | CORO1A             | 2  | 16454000 |
| FOP remission | P03950                        | Angiogenin                                                         | ANG                | 1  | 16277000 |
| FOP remission | B0I1T2;B0I1T2-3;B0I1T2-4      | Unconventional myosin-Ig;Minor histocompatibility antigen HA       | MYO1G              | 2  | 16097000 |
| FOP remission | H0Y512;Q9HDC9-2;Q9HDC9        | Adipocyte plasma membrane-associated protein                       | APMAP              | 2  | 15440000 |
| FOP remission | P02042;E9PFT6;E9PEW8;Q3SX09   | Hemoglobin subunit delta                                           | HBD                | 6  | 15415000 |
| FOP remission | A0A0C4DH33                    | Immunoglobulin heavy variable 1-24                                 | IGHV1-24           | 1  | 14040000 |
| FOP remission | P11169;F5GYR5;Q8TDB8-4;Q8TD   | Solute carrier family 2, facilitated glucose transporter member    | SLC2A3             | 1  | 13744000 |
| FOP remission | P62328                        | Thymosin beta-4;Hematopoietic system regulatory peptide            | TMSB4X             | 1  | 13523000 |
| FOP remission | A0A0U1RR20;Q92954-5;Q92954    | Proteoglycan 4;Proteoglycan 4 C-terminal part                      | PRG4               | 2  | 12803000 |
| FOP remission | P80723                        | Brain acid soluble protein 1                                       | BASP1              | 1  | 12592000 |
| FOP remission | Q5TOR7;Q5TOR6;Q5TOR5;Q5TOR    | Adenylyl cyclase-associated protein;Adenylyl cyclase-associated    | CAP1               | 2  | 12411000 |
| FOP remission | P11597-2;P11597;H3BRJ9        | Cholesteryl ester transfer protein                                 | CETP               | 2  | 11889000 |
| FOP remission | C9JS68;A0A0A0MSK3;Q53F23;A0   | Thromboxane-A synthase                                             | TBXAS1             | 1  | 11528000 |
| FOP remission | H3BMH2;H3BSC1;P62491-2;Q15    | Ras-related protein Rab-11A;Ras-related protein Rab-11B            | RAB11A;RAB11B      | 2  | 11506000 |
| FOP remission | A0A0B4J1U3                    | Immunoglobulin lambda variable 1-36                                | IGLV1-36           | 2  | 11248000 |
| FOP remission | P24844-2;P24844;J3KTJ1;J3QRS3 | Myosin regulatory light polypeptide 9;Myosin regulatory light c    | MYL9;MYL12A;MYL    | 2  | 10706000 |
| FOP remission | P68133;P68032;P63267;P62736;  | Actin, alpha skeletal muscle;Actin, alpha cardiac muscle 1;Actin   | ACTA1;ACTC1;ACTG   | 11 | 10603000 |
| FOP remission | H0Y8L3;Q15582;H0YAB8;H0Y9D7   | Transforming growth factor-beta-induced protein ig-h3              | TGFBI              | 1  | 9655900  |
| FOP remission | P54709;H7C4L9;H7C547;F8WBV4   | Sodium/potassium-transporting ATPase subunit beta-3                | ATP1B3             | 2  | 9481800  |
| FOP remission | P55056                        | Apolipoprotein C-IV                                                | APOC4              | 1  | 9416600  |
| FOP remission | P48740-4;P48740-2;F8W876;P48  | Mannan-binding lectin serine protease 1;Mannan-binding lectin      | MASP1              | 1  | 9042000  |

|               |                              |                                                                       |             |     |          |
|---------------|------------------------------|-----------------------------------------------------------------------|-------------|-----|----------|
| FOP remission | P13796;P13796-2;U3KQI3;Q5TBN | Plastin-2                                                             | LCP1        | 3   | 8344100  |
| FOP remission | E5RK69;P08133-2;P08133;E7EM  | Annexin;Annexin A6                                                    | ANXA6       | 2   | 8130700  |
| FOP remission | X6RJP6;P37802;P37802-2       | Transgelin-2                                                          | TAGLN2      | 2   | 7636000  |
| FOP remission | P05976-2;P05976;P08590       | Myosin light chain 1/3, skeletal muscle isoform;Myosin light chain    | MYL1;MYL3   | 1   | 5716900  |
| FOP remission | Q15404-2;Q15404              | Ras suppressor protein 1                                              | RSU1        | 1   | 5522400  |
| FOP remission | A0A0B4J1V0                   | Immunoglobulin heavy variable 3-15                                    | IGHV3-15    | 3   | 4701700  |
| FOP remission | P07948-2;P07948              | Tyrosine-protein kinase Lyn                                           | LYN         | 1   | 4451400  |
| FOP remission | F8VR50;C9JZD1;O15145         | Actin-related protein 2/3 complex subunit 3                           | ARPC3       | 1   | 4307000  |
| FOP remission | E7EQB2;E7ER44;P02788-2;P0278 | Lactotransferrin;Lactoferricin-H;Kaliocin-1;Lactoferroxin-A;Lactoferr | LTF         | 1   | 3970600  |
| FOP remission | P61981;P31946-2;P31946;Q4VY2 | 14-3-3 protein gamma;14-3-3 protein gamma, N-terminally processed     | YWHAG;YWHAB | 5   | 3118200  |
| FOP remission | P15144;H0YLZ8                | Aminopeptidase N                                                      | ANPEP       | 1   | 2650200  |
| FOP remission | P60953;Q5JYX0;P60953-1       | Cell division control protein 42 homolog                              | CDC42       | 1   | 2276900  |
| FOP remission | P84095                       | Rho-related GTP-binding protein RhoG                                  | RHOG        | 1   | 2024300  |
| FOP remission | G8JLJ2;F5H3C5;F5H4R2;A0A0C4D | Superoxide dismutase;Superoxide dismutase [Mn], mitochondrial         | SOD2        | 1   | 1666000  |
| FOP flare     | P02647;F8W696;P15497         | Apolipoprotein A-I;Proapolipoprotein A-I;Truncated apolipoprotein     | APOA1       | 33  | 2.36E+11 |
| FOP flare     | P01023;F8W7L3;H0YFH1;ENSEM   | Alpha-2-macroglobulin                                                 | A2M         | 58  | 1.91E+11 |
| FOP flare     | P02671;P02671-2;A0A087WUA0   | Fibrinogen alpha chain;Fibrinopeptide A;Fibrinogen alpha chain        | FGA         | 38  | 1.64E+11 |
| FOP flare     | P01024;Q2UVX4;M0QYC8;M0QX    | Complement C3;Complement C3 beta chain;C3-beta-c;Complement           | C3          | 83  | 1.11E+11 |
| FOP flare     | A0A087WYJ9;A0A075B6N9;A0A1   | Ig mu chain C region;Ig mu heavy chain disease protein                | IGHM        | 25  | 1.08E+11 |
| FOP flare     | P02675;D6REL8;P02676         | Fibrinogen beta chain;Fibrinopeptide B;Fibrinogen beta chain          | FGB         | 38  | 1E+11    |
| FOP flare     | C9JEU5;P02679-2;C9JC84;P0267 | Fibrinogen gamma chain                                                | FGG         | 20  | 8.41E+10 |
| FOP flare     | P01009;P01009-2;P01009-3     | Alpha-1-antitrypsin;Short peptide from AAT                            | SERPINA1    | 25  | 6.92E+10 |
| FOP flare     | P01876                       | Ig alpha-1 chain C region                                             | IGHA1       | 12  | 6.38E+10 |
| FOP flare     | P00738;J3QLC9;A0A0C4DGL8;J3C | Haptoglobin;Haptoglobin alpha chain;Haptoglobin beta chain            | HP          | 21  | 6.21E+10 |
| FOP flare     | P04114;A8MUN2;ENSEMBL:ENSE   | Apolipoprotein B-100;Apolipoprotein B-48                              | APOB        | 170 | 4.17E+10 |
| FOP flare     | P02787;H7C5E8;C9JVG0;C9JB55; | Serotransferrin                                                       | TF          | 41  | 3.9E+10  |
| FOP flare     | P02790;Q9BS19                | Hemopexin                                                             | HPX         | 21  | 3.75E+10 |
| FOP flare     | P68871;F8W6P5;A0A0J9YWK4     | Hemoglobin subunit beta;LVV-hemorphin-7;Spinorphin                    | HBB         | 13  | 3.58E+10 |
| FOP flare     | A0A0A0MS08;P01857;A0A0A0M    | Ig gamma-1 chain C region                                             | IGHG1       | 12  | 3.11E+10 |
| FOP flare     | P01011;G3V3A0;A0A087WY93     | Alpha-1-antichymotrypsin;Alpha-1-antichymotrypsin His-Pro-le          | SERPINA3    | 18  | 2.84E+10 |
| FOP flare     | P01834;A0A075B6H6            | Ig kappa chain C region                                               | IGKC        | 9   | 2.17E+10 |
| FOP flare     | A0A140TA29;A0A0G2JL54;F5GXS  | C4a anaphylatoxin                                                     | C4B         | 58  | 1.84E+10 |
| FOP flare     | P00450;E9PFZ2;H7C5R1;D6RE86  | Ceruloplasmin                                                         | CP          | 35  | 1.78E+10 |

|           |                               |                                                                   |                   |    |          |
|-----------|-------------------------------|-------------------------------------------------------------------|-------------------|----|----------|
| FOP flare | P60709;G5E9R0;E7EVS6;P63267   | Actin, cytoplasmic 1;Actin, cytoplasmic 1, N-terminally processed | ACTB              | 18 | 1.38E+10 |
| FOP flare | A0A075B6L0;A0A075B6K9;POCG    | Ig lambda-2 chain C regions;Ig lambda-3 chain C regions;Ig lambda | IGLC3;IGLC2;IGLC6 | 5  | 1.25E+10 |
| FOP flare | Q14624                        | Inter-alpha-trypsin inhibitor heavy chain H4;70 kDa inter-alpha-  | ITIH4             | 26 | 1.16E+10 |
| FOP flare | Q5T985;P19823;Q5T987;Q9TRI1   | Inter-alpha-trypsin inhibitor heavy chain H2                      | ITIH2             | 22 | 1.15E+10 |
| FOP flare | P02751-5;P02751-17;P02751-3;P | Fibronectin;Anastellin;Ugl-Y1;Ugl-Y2;Ugl-Y3                       | FN1               | 35 | 1.14E+10 |
| FOP flare | P01008;Q8TCE1;P41361          | Antithrombin-III                                                  | SERPINC1          | 19 | 1.04E+10 |
| FOP flare | P04217;P04217-2;M0R009;Q2KJ   | Alpha-1B-glycoprotein                                             | A1BG              | 17 | 9.68E+09 |
| FOP flare | P06727;Q32PJ2                 | Apolipoprotein A-IV                                               | APOA4             | 31 | 9.48E+09 |
| FOP flare | P08603;A0A0D9SG88;P08603-2;   | Complement factor H                                               | CFH               | 20 | 9.38E+09 |
| FOP flare | B0YIW2;P02656                 | Apolipoprotein C-III                                              | APOC3             | 6  | 8.77E+09 |
| FOP flare | P19827;P19827-2;F8WAS2;P198   | Inter-alpha-trypsin inhibitor heavy chain H1                      | ITIH1             | 15 | 8.76E+09 |
| FOP flare | P04004;H0YJW9;Q3ZBS7          | Vitronectin;Vitronectin V65 subunit;Vitronectin V10 subunit;So    | VTN               | 14 | 8.55E+09 |
| FOP flare | P10909-4;P10909;P10909-5;P10  | Clusterin;Clusterin beta chain;Clusterin alpha chain;Clusterin    | CLU               | 17 | 8.47E+09 |
| FOP flare | E9PGN7;P05155-2;P05155;P0515  | Plasma protease C1 inhibitor                                      | SERPING1          | 18 | 7.98E+09 |
| FOP flare | A0A075B6N8;P01860             | Ig gamma-3 chain C region                                         | IGHG3             | 13 | 7.71E+09 |
| FOP flare | P02763                        | Alpha-1-acid glycoprotein 1                                       | ORM1              | 5  | 7.16E+09 |
| FOP flare | P00747;Q5TEH5;A6PVI2;Q15195   | Plasminogen;Plasmin heavy chain A;Activation peptide;Angiosta     | PLG               | 12 | 7.03E+09 |
| FOP flare | P01042                        | Kininogen-1;Kininogen-1 heavy chain;T-kinin;Bradykinin;Lysyl-b    | KNG1              | 11 | 6.41E+09 |
| FOP flare | S4R460;A0A0B4J2B5             | Immunoglobulin heavy variable 3/OR16-9 (non-functional) ; Im      | IGHV3OR16-9       | 2  | 5.72E+09 |
| FOP flare | P02649;H0Y7L5;E9PEV4;E7ERP7;  | Apolipoprotein E                                                  | APOE              | 17 | 5.13E+09 |
| FOP flare | P01031;Q1A7A4                 | Complement C5;Complement C5 beta chain;Complement C5 al           | C5                | 34 | 5.02E+09 |
| FOP flare | E7ETN3;B4E1Z4;P00751;H7C5H1   | Complement factor B;Complement factor B Ba fragment;Comp          | CFB               | 22 | 4.89E+09 |
| FOP flare | P02730;P02730-2;A0A0A0MS98    | Band 3 anion transport protein                                    | SLC4A1            | 21 | 4.57E+09 |
| FOP flare | P02747                        | Complement C1q subcomponent subunit C                             | C1QC              | 5  | 4.39E+09 |
| FOP flare | P06396;A0A0A0MS51;A0A0A0M     | Gelsolin                                                          | GSN               | 14 | 4.19E+09 |
| FOP flare | V9GYE3;V9GYG9;V9GYM3;P0265    | Apolipoprotein A-II;Proapolipoprotein A-II;Truncated apolipop     | APOA2             | 3  | 4.04E+09 |
| FOP flare | P00734;E9PIT3;C9JV37;P00735   | Prothrombin;Activation peptide fragment 1;Activation peptide      | F2                | 14 | 3.94E+09 |
| FOP flare | P05546;ENSEMBL:ENSBTAP0000    | Heparin cofactor 2                                                | SERPIND1          | 14 | 3.74E+09 |
| FOP flare | A0A0B4J1X5;A0A075B7E8;A0A0J   | Immunoglobulin heavy variable 3-74                                | IGHV3-74;IGHV3OR  | 4  | 3.71E+09 |
| FOP flare | P02766;A0A087WV45;A0A087W     | Transthyretin                                                     | TTR               | 9  | 3.7E+09  |
| FOP flare | D6RF35;D6RF20;D6RBJ7          | D6RF35                                                            | GC                | 8  | 3.53E+09 |
| FOP flare | P27169;F8WF42                 | Serum paraoxonase/arylesterase 1                                  | PON1              | 10 | 3.49E+09 |
| FOP flare | P01780;A0A0B4J1V1;P01763;P0   | Ig heavy chain V-III region JON                                   |                   | 5  | 3.22E+09 |

|           |                               |                                                                    |                   |    |          |
|-----------|-------------------------------|--------------------------------------------------------------------|-------------------|----|----------|
| FOP flare | A0A0B4J1Y9;A0A075B7D8         | Immunoglobulin heavy variable 3-72                                 | IGHV3-72          | 5  | 3.14E+09 |
| FOP flare | P0DJ18;E9PQD6;E9PR14;G3V1D9   | Serum amyloid A-1 protein;Amyloid protein A;Serum amyloid p        | SAA1              | 8  | 2.92E+09 |
| FOP flare | A0A0A0MRZ8;P04433             | Ig kappa chain V-III region VG                                     | IGKV3D-11         | 1  | 2.88E+09 |
| FOP flare | P06310;A0A075B6S6             | Ig kappa chain V-II region RPMI 6410                               | IGKV2D-30         | 3  | 2.63E+09 |
| FOP flare | P00739;P00739-2;A0A0A0MRD9    | Haptoglobin-related protein                                        | HPR               | 14 | 2.57E+09 |
| FOP flare | P07225;G5E9F8;H7BXT0;P07224   | Vitamin K-dependent protein S                                      |                   | 12 | 2.56E+09 |
| FOP flare | A0A0B4J1U7                    | Immunoglobulin heavy variable 6-1                                  | IGHV6-1           | 2  | 2.4E+09  |
| FOP flare | A0A087X0Q4;A0A075B6P5;A0A0    | Ig kappa chain V-II region FR;Ig kappa chain V-II region Cum       | IGKV2-40;IGKV2D-2 | 2  | 2.28E+09 |
| FOP flare | Q60FE5;P21333-2;P21333;Q5HY   | Filamin-A                                                          | FLNA              | 37 | 2.23E+09 |
| FOP flare | A0A087X232;P09871;F8WCZ6;H    | Complement C1s subcomponent;Complement C1s subcompon               | C1S               | 11 | 2.15E+09 |
| FOP flare | Q9Y490;H0YMT1;A0A1C7CYV7;A    | Talin-1                                                            | TLN1              | 39 | 2.13E+09 |
| FOP flare | P01019                        | Angiotensinogen;Angiotensin-1;Angiotensin-2;Angiotensin-3;Ar       | AGT               | 11 | 2.1E+09  |
| FOP flare | P01624                        | Ig kappa chain V-III region POM                                    |                   | 2  | 2.06E+09 |
| FOP flare | D6RD17;P01591;C9JA05;D6RHJ6   | Immunoglobulin J chain                                             | JCHAIN;IGJ        | 3  | 1.92E+09 |
| FOP flare | P02748;Q3MHN2                 | Complement component C9;Complement component C9a;Com               | C9                | 9  | 1.89E+09 |
| FOP flare | P01619                        | Ig kappa chain V-III region B6                                     |                   | 1  | 1.86E+09 |
| FOP flare | O43866                        | CD5 antigen-like                                                   | CD5L              | 3  | 1.8E+09  |
| FOP flare | O14791-3;O14791;O14791-2;B1   | Apolipoprotein L1                                                  | APOL1             | 7  | 1.79E+09 |
| FOP flare | C9JF17;P05090;C9JX71          | Apolipoprotein D                                                   | APOD              | 8  | 1.7E+09  |
| FOP flare | P06312                        | Ig kappa chain V-IV region                                         | IGKV4-1           | 3  | 1.68E+09 |
| FOP flare | P08697-2;P08697;A0A0G2JPA8;C  | Alpha-2-antiplasmin                                                | SERPINF2          | 10 | 1.56E+09 |
| FOP flare | P08514;P08514-3;P08514-2      | Integrin alpha-IIb;Integrin alpha-IIb heavy chain;Integrin alpha-I | ITGA2B            | 13 | 1.56E+09 |
| FOP flare | P02750                        | Leucine-rich alpha-2-glycoprotein                                  | LRG1              | 6  | 1.33E+09 |
| FOP flare | A0A0G2JMB2;P01877;A0A075B6    | Ig alpha-2 chain C region                                          | IGHA2             | 10 | 1.3E+09  |
| FOP flare | A6NMB1                        | Sialic acid-binding Ig-like lectin 16                              | SIGLEC16          | 1  | 1.27E+09 |
| FOP flare | K7ERI9;P02654;K7EKP1;K7EJ19;K | Apolipoprotein C-I;Truncated apolipoprotein C-I                    | APOC1             | 5  | 1.25E+09 |
| FOP flare | A0A0C4DH68;A0A075B6R9         | Immunoglobulin kappa variable 2-24                                 | IGKV2-24;IGKV2D-2 | 3  | 1.24E+09 |
| FOP flare | Q86UX7-2;Q86UX7;F5H1C6;H0YF   | Fermitin family homolog 3                                          | FERMT3            | 18 | 1.15E+09 |
| FOP flare | P02743                        | Serum amyloid P-component;Serum amyloid P-component(1-2            | APCS              | 8  | 1.07E+09 |
| FOP flare | P04003;F2Z2V7;A6PVY5          | C4b-binding protein alpha chain                                    | C4BPA             | 6  | 1.06E+09 |
| FOP flare | P02745;X6RLJ0                 | Complement C1q subcomponent subunit A                              | C1QA              | 3  | 1.03E+09 |
| FOP flare | Q06033-2;Q06033;A0A087WW4     | Inter-alpha-trypsin inhibitor heavy chain H3                       | ITIH3             | 12 | 1.03E+09 |
| FOP flare | A0A024R0T9;K7ER74;P02655;Q6   | Apolipoprotein C-II;Proapolipoprotein C-II                         | APOC2;APOC4-APO   | 3  | 1.01E+09 |

|           |                                |                                                                    |                |    |          |
|-----------|--------------------------------|--------------------------------------------------------------------|----------------|----|----------|
| FOP flare | P02549-2;P02549;V9GY79         | Spectrin alpha chain, erythrocytic 1                               | SPTA1          | 39 | 1.01E+09 |
| FOP flare | P36955;I3L4N7;I3L4F9;I3L107;Q9 | Pigment epithelium-derived factor                                  | SERPINF1       | 10 | 9.92E+08 |
| FOP flare | P51884;Q05443                  | Lumican                                                            | LUM            | 7  | 9.91E+08 |
| FOP flare | P01859                         | Ig gamma-2 chain C region                                          | IGHG2          | 10 | 9.78E+08 |
| FOP flare | P01700;P01699                  | Ig lambda chain V-I region HA;Ig lambda chain V-I region VOR       |                | 3  | 9.54E+08 |
| FOP flare | A0A0A0MSV6;D6R934;P02746;D     | Complement C1q subcomponent subunit B                              | C1QB           | 6  | 9.18E+08 |
| FOP flare | P11277-3;P11277;P11277-2;HOY   | Spectrin beta chain, erythrocytic                                  | SPTB           | 30 | 9.03E+08 |
| FOP flare | P22792                         | Carboxypeptidase N subunit 2                                       | CPN2           | 8  | 9E+08    |
| FOP flare | HOYAC1;P03952;E9PBC5           | Plasma kallikrein;Plasma kallikrein heavy chain;Plasma kallikrein  | KLKB1          | 6  | 8.97E+08 |
| FOP flare | C9JV77;P02765                  | Alpha-2-HS-glycoprotein;Alpha-2-HS-glycoprotein chain A;Alpha      | AHSG           | 3  | 8.71E+08 |
| FOP flare | O75636-2;O75636                | Ficolin-3                                                          | FCN3           | 4  | 8.64E+08 |
| FOP flare | P08185;G3V4V7;G3V350           | Corticosteroid-binding globulin                                    | SERPINA6       | 5  | 8.55E+08 |
| FOP flare | P01042-2;P01042-3;P01045-1;Q   | Kininogen-1;Kininogen-1 heavy chain;T-kinin;Bradykinin;Lysyl-b     | KNG1           | 10 | 8.31E+08 |
| FOP flare | P10643;Q29RQ1                  | Complement component C7                                            | C7             | 14 | 8.18E+08 |
| FOP flare | A0A024R6I7;A0A0G2JRN3;G3V2B    | Alpha-1-antitrypsin                                                | SERPINA1       | 25 | 8E+08    |
| FOP flare | P35858;P35858-2                | Insulin-like growth factor-binding protein complex acid labile su  | IGFALS         | 15 | 7.89E+08 |
| FOP flare | A0A0C4DH25                     | Immunoglobulin kappa variable 3D-20                                | IGKV3D-20      | 1  | 7.79E+08 |
| FOP flare | A0A096LPE2;P35542              | Serum amyloid A-4 protein                                          | SAA2-SAA4;SAA4 | 6  | 7.04E+08 |
| FOP flare | P43652;REFSEQ:XP_585019        | Afamin                                                             | AFM            | 8  | 7.01E+08 |
| FOP flare | P11166;A6NL68;A0A0D9SG74;A0    | Solute carrier family 2, facilitated glucose transporter member    | SLC2A1         | 6  | 6.88E+08 |
| FOP flare | Q5SRP5;O95445-2;O95445         | Apolipoprotein M                                                   | APOM           | 2  | 6.85E+08 |
| FOP flare | P16157-11;P16157-9;P16157-6;P  | Ankyrin-1                                                          | ANK1           | 25 | 6.58E+08 |
| FOP flare | P63104;E7EX29;E7ESK7;B0AZS6;   | 14-3-3 protein zeta/delta                                          | YWHAZ          | 8  | 6.56E+08 |
| FOP flare | P05106;I3L4X8;H3BM21;P05106    | Integrin beta-3;Integrin beta                                      | ITGB3          | 4  | 6.29E+08 |
| FOP flare | P26038;E7EQR4;P35241;P15311    | Moesin                                                             | MSN            | 11 | 6.24E+08 |
| FOP flare | P01599                         | Ig kappa chain V-I region Gal                                      |                | 3  | 6.14E+08 |
| FOP flare | P27105;F8VSL7;P27105-2         | Erythrocyte band 7 integral membrane protein                       | STOM           | 8  | 5.67E+08 |
| FOP flare | P32119;A6NIW5;P32119-2         | Peroxiredoxin-2                                                    | PRDX2          | 7  | 5.65E+08 |
| FOP flare | G3XAM2;E7ETH0;P05156;D6R9Z     | Complement factor I;Complement factor I heavy chain;Comple         | CFI            | 6  | 5.62E+08 |
| FOP flare | Q96PD5;Q96PD5-2;ENSEMBL:EN     | N-acetylmuramoyl-L-alanine amidase                                 | PGLYRP2        | 8  | 5.6E+08  |
| FOP flare | P29622                         | Kallistatin                                                        | SERPINA4       | 11 | 5.2E+08  |
| FOP flare | P01861                         | Ig gamma-4 chain C region                                          | IGHG4          | 8  | 4.97E+08 |
| FOP flare | P02775                         | Platelet basic protein;Connective tissue-activating peptide III;TC | PPBP           | 3  | 4.9E+08  |



|           |                                    |                                                                                                 |                     |    |          |
|-----------|------------------------------------|-------------------------------------------------------------------------------------------------|---------------------|----|----------|
| FOP flare | Q8WWZ8;Q8WWZ8-2                    | Oncoprotein-induced transcript 3 protein                                                        | OIT3                | 5  | 4.72E+08 |
| FOP flare | P19652                             | Alpha-1-acid glycoprotein 2                                                                     | ORM2                | 5  | 4.68E+08 |
| FOP flare | A0A0A0MRJ7;P12259                  | Coagulation factor V;Coagulation factor V heavy chain;Coagulation factor V heavy chain          | F5                  | 12 | 4.68E+08 |
| FOP flare | P05543;Q9TT36                      | Thyroxine-binding globulin                                                                      | SERPINA7            | 6  | 4.39E+08 |
| FOP flare | P02786;G3V0E5;H7C3V5;F8WBE         | Transferrin receptor protein 1;Transferrin receptor protein 1, secreted                         | TFRC                | 12 | 4.37E+08 |
| FOP flare | E9PP50;P23528;E9PLJ3;E9PS23;E9PS24 | Cofilin-1;Cofilin-2                                                                             | CFL1;CFL2           | 2  | 4.33E+08 |
| FOP flare | A0A075B6K8;A0A0B4J231;P0CG0        | Ig lambda-1 chain C regions;Immunoglobulin lambda-like polypeptide                              | IGLC1;IGLL5         | 3  | 4.32E+08 |
| FOP flare | P35579;P35579-2;P35580;P35581      | Myosin-9                                                                                        | MYH9                | 21 | 4.15E+08 |
| FOP flare | A0A075B6S2;A0A0A0MRZ7              | Immunoglobulin kappa variable 2D-26                                                             | IGKV2D-29;IGKV2D-26 | 3  | 4.14E+08 |
| FOP flare | P13671                             | Complement component C6                                                                         | C6                  | 5  | 4.04E+08 |
| FOP flare | P04275                             | von Willebrand factor;von Willebrand antigen 2                                                  | VWF                 | 9  | 3.86E+08 |
| FOP flare | Q08380;K7EP36;K7EJY8;K7ESM3        | Galectin-3-binding protein                                                                      | LGALS3BP            | 7  | 3.83E+08 |
| FOP flare | A0A075B7D0                         | Immunoglobulin heavy variable 1/OR15-1 (non-functional)                                         | IGHV1OR15-1         | 1  | 3.8E+08  |
| FOP flare | P07360;Q5SQ08                      | Complement component C8 gamma chain                                                             | C8G                 | 5  | 3.66E+08 |
| FOP flare | S4R3Y4;P02760;S4R471               | Protein AMBP;Alpha-1-microglobulin;Inter-alpha-trypsin inhibitor                                | AMBP                | 3  | 3.64E+08 |
| FOP flare | A0A075B6I0                         | Immunoglobulin lambda variable 8-61                                                             | IGLV8-61            | 1  | 3.61E+08 |
| FOP flare | A0A0C4DH42;A0A0J9YVT0;P0176        | Ig heavy chain V-III region BUT;Ig heavy chain V-III region KOL;Ig heavy chain V-III region KOL | IGHV3-66;IGHV3-23   | 3  | 3.53E+08 |
| FOP flare | P02776;P10720                      | Platelet factor 4;Platelet factor 4, short form;Platelet factor 4 variant                       | PF4;PF4V1           | 1  | 3.46E+08 |
| FOP flare | P00488;Q9NQP5;A6PVK5               | Coagulation factor XIII A chain                                                                 | F13A1               | 7  | 3.43E+08 |
| FOP flare | P16452-3;P16452;P16452-2;H3B       | Erythrocyte membrane protein band 4.2                                                           | EPB42               | 6  | 3.43E+08 |
| FOP flare | P02749;J3QRN2;J3KS17;J3QLI0;P      | Beta-2-glycoprotein 1                                                                           | APOH                | 3  | 3.35E+08 |
| FOP flare | P06753-4;P06753-3;P06753-6;P0      | Tropomyosin alpha-3 chain                                                                       | TPM3;DKFZp686J13    | 8  | 3.31E+08 |
| FOP flare | A0A087X1J7;P22352;H0YBE4;E5F       | Glutathione peroxidase;Glutathione peroxidase 3                                                 | GPX3                | 6  | 3.16E+08 |
| FOP flare | P18428                             | Lipopolysaccharide-binding protein                                                              | LBP                 | 7  | 3.11E+08 |
| FOP flare | A0A0B4J1V0                         | Immunoglobulin heavy variable 3-15                                                              | IGHV3-15            | 4  | 3.1E+08  |
| FOP flare | P07737;K7EJ44;I3L3D5;P02584        | Profilin-1                                                                                      | PFN1                | 8  | 2.95E+08 |
| FOP flare | P01594;P01593                      | Ig kappa chain V-I region AU;Ig kappa chain V-I region AG                                       |                     | 1  | 2.88E+08 |
| FOP flare | P01704                             | Ig lambda chain V-II region TOG                                                                 |                     | 1  | 2.86E+08 |
| FOP flare | P15169;B1AP58;Q2KJ83               | Carboxypeptidase N catalytic chain                                                              | CPN1                | 4  | 2.85E+08 |
| FOP flare | P07357                             | Complement component C8 alpha chain                                                             | C8A                 | 4  | 2.73E+08 |
| FOP flare | A6NNI4;G8JLH6;P21926;F5GXT1;       | Tetraspanin;CD9 antigen                                                                         | CD9                 | 3  | 2.69E+08 |
| FOP flare | P08493;P08493-2                    | Matrix Gla protein                                                                              | MGP                 | 2  | 2.68E+08 |
| FOP flare | B4DPQ0;P00736;F5H2D0;F5H1V0        | Complement C1r subcomponent;Complement C1r subcomponent                                         | C1R                 | 8  | 2.57E+08 |

|           |                                      |                                                                                                                  |                     |    |          |
|-----------|--------------------------------------|------------------------------------------------------------------------------------------------------------------|---------------------|----|----------|
| FOP flare | P04899;P04899-4;P04899-6;P04899-7    | Guanine nucleotide-binding protein G(i) subunit alpha-2                                                          | GNAI2               | 4  | 2.54E+08 |
| FOP flare | E5RH81;E5RHP7;P00915;E5RII2;E5RII3   | Carbonic anhydrase 1                                                                                             | CA1                 | 6  | 2.5E+08  |
| FOP flare | P13224;P13224-2                      | Platelet glycoprotein Ib beta chain                                                                              | GP1BB               | 2  | 2.4E+08  |
| FOP flare | P20742;P20742-2                      | Pregnancy zone protein                                                                                           | PZP                 | 16 | 2.4E+08  |
| FOP flare | E9PKE3;P11142;P11142-2;E9PN8         | Heat shock cognate 71 kDa protein;Heat shock-related 70 kDa protein                                              | HSPA8;HSPA2         | 8  | 2.32E+08 |
| FOP flare | P49454                               | Centromere protein F                                                                                             | CENPF               | 1  | 2.26E+08 |
| FOP flare | P00740-2;P00740                      | Coagulation factor IX;Coagulation factor IXa light chain;Coagulation factor IXa heavy chain                      | F9                  | 3  | 2.16E+08 |
| FOP flare | A0A0G2JPR0;A0A140TA49;P0103          | C4a anaphylatoxin                                                                                                | C4A                 | 57 | 2.12E+08 |
| FOP flare | P67936;P67936-2;K7EQW8;K7EP          | Tropomyosin alpha-4 chain                                                                                        | TPM4                | 6  | 2.06E+08 |
| FOP flare | P61224-2;P61224-3;P61224;A0A0A0J9YU9 | Ras-related protein Rap-1b;Ras-related protein Rap-1A;Ras-related protein Rap-1A                                 | RAP1B;RAP1A         | 5  | 2.04E+08 |
| FOP flare | P43251-4;P43251;P43251-3;P43251-2    | Biotinidase                                                                                                      | BTD                 | 3  | 1.87E+08 |
| FOP flare | A0A0C4DH38                           | Immunoglobulin heavy variable 5-51                                                                               | IGHV5-51            | 3  | 1.86E+08 |
| FOP flare | P18206-2;P18206;Q5JQ13;P18206        | Vinculin                                                                                                         | VCL                 | 9  | 1.8E+08  |
| FOP flare | P01701                               | Ig lambda chain V-I region NEW                                                                                   |                     | 1  | 1.74E+08 |
| FOP flare | P80108                               | Phosphatidylinositol-glycan-specific phospholipase D                                                             | GPLD1               | 6  | 1.67E+08 |
| FOP flare | A0A087WZB5;Q9HBI1-3;Q9HBI1           | Beta-parvin                                                                                                      | PARVB               | 4  | 1.66E+08 |
| FOP flare | P04196                               | Histidine-rich glycoprotein                                                                                      | HRG                 | 6  | 1.62E+08 |
| FOP flare | P06702                               | Protein S100-A9                                                                                                  | S100A9              | 2  | 1.58E+08 |
| FOP flare | F5GY80;F5H7G1;P07358                 | Complement component C8 beta chain                                                                               | C8B                 | 8  | 1.57E+08 |
| FOP flare | B4DQI1;A0A0G2JL69;P06681-3;P06681-2  | Complement C2;Complement C2b fragment;Complement C2a fragment                                                    | C2                  | 10 | 1.55E+08 |
| FOP flare | A0A075B6K5;P80748                    | Immunoglobulin lambda variable 3-9                                                                               | IGLV3-9             | 1  | 1.55E+08 |
| FOP flare | F8VPF3;F8W1R7;J3KND3;G8JLA2          | Myosin light polypeptide 6;Myosin light chain 6B                                                                 | MYL6;MYL6B          | 2  | 1.42E+08 |
| FOP flare | A0A0C4DH36                           | Probable non-functional immunoglobulin heavy variable 3-38                                                       | IGHV3-38            | 1  | 1.35E+08 |
| FOP flare | P06331;A0A0J9YWU9;A0A0C4DH36         | Ig heavy chain V-II region ARH-77;Ig heavy chain V-II region NEW                                                 | IGHV4-61            | 1  | 1.34E+08 |
| FOP flare | P62805                               | Histone H4                                                                                                       | HIST1H4A            | 4  | 1.34E+08 |
| FOP flare | J3QSE5;P04180;I3L1Q6;J3QKTO          | Phosphatidylcholine-sterol acyltransferase                                                                       | LCAT                | 3  | 1.32E+08 |
| FOP flare | P00748                               | Coagulation factor XII;Coagulation factor XIIa heavy chain;Beta-2-microglobulin                                  | F12                 | 1  | 1.3E+08  |
| FOP flare | A0A0A0MT36;A0A0C4DH26                | Immunoglobulin kappa variable 6D-21                                                                              | IGKV6D-21;IGKV6D-21 | 1  | 1.29E+08 |
| FOP flare | F6X3N5;F6UT28;P62873-2;P62873-1      | Guanine nucleotide-binding protein G(I)/G(S)/G(T) subunit beta                                                   | GNB1                | 5  | 1.24E+08 |
| FOP flare | A0A140T8W8;A0A140T8Y4;A0A0A0J9YU9    | HLA class I histocompatibility antigen, A-66 alpha chain;HLA class I histocompatibility antigen, A-66 beta chain | HLA-A               | 5  | 1.21E+08 |
| FOP flare | A0A087WSY6                           | Immunoglobulin kappa variable 3D-15                                                                              | IGKV3D-15           | 2  | 1.21E+08 |
| FOP flare | Q5SRN7;A0A0G2JI36;Q5SRN5;A0A0A0J9YU9 | HLA class I histocompatibility antigen, A-36 alpha chain;HLA class I histocompatibility antigen, A-36 beta chain | HLA-A;HLA-H;HLA-C   | 3  | 1.19E+08 |
| FOP flare | P06733-2;P06733;K7EM90               | Alpha-enolase;Enolase                                                                                            | ENO1                | 2  | 1.14E+08 |

|           |                                     |                                                                                                                       |                      |    |          |
|-----------|-------------------------------------|-----------------------------------------------------------------------------------------------------------------------|----------------------|----|----------|
| FOP flare | E7EU05;P16671-4;P16671-3;P16671-2   | Platelet glycoprotein 4                                                                                               | CD36                 | 2  | 1.13E+08 |
| FOP flare | P0DJ19                              | Serum amyloid A-2 protein                                                                                             | SAA2                 | 4  | 1.09E+08 |
| FOP flare | P48059;F8WB59;A0A0J9YYC1;A0A0J9YYC2 | LIM and senescent cell antigen-like-containing domain protein 1                                                       | LIMS1                | 2  | 1.08E+08 |
| FOP flare | Q13103                              | Secreted phosphoprotein 24                                                                                            | SPP2                 | 1  | 1.08E+08 |
| FOP flare | P62328                              | Thymosin beta-4;Hematopoietic system regulatory peptide                                                               | TMSB4X               | 1  | 95310000 |
| FOP flare | O75882-3;O75882-2;O75882            | Attractin                                                                                                             | ATRN                 | 5  | 93700000 |
| FOP flare | Q14520-2;Q14520                     | Hyaluronan-binding protein 2;Hyaluronan-binding protein 2 50                                                          | HABP2                | 3  | 93395000 |
| FOP flare | F8WF14;P06276;H7C4Y0;HOY885         | Carboxylic ester hydrolase;Cholinesterase                                                                             | BCHE                 | 2  | 92764000 |
| FOP flare | P06396-2;Q5T0I0                     | Gelsolin                                                                                                              | GSN                  | 14 | 92756000 |
| FOP flare | P04040                              | Catalase                                                                                                              | CAT                  | 4  | 91268000 |
| FOP flare | C9JB90;C9JU14;J3KR73;P20340-4       | Ras-related protein Rab-6A;Ras-related protein Rab-6B;Ras-related protein Rab-6C                                      | RAB6B;RAB6A;RAB6C    | 1  | 91194000 |
| FOP flare | P00742                              | Coagulation factor X;Factor X light chain;Factor X heavy chain;Factor X zymogen                                       | F10                  | 2  | 89906000 |
| FOP flare | Q4VB86;P11171-6;P11171-4;P11171-3   | Protein 4.1                                                                                                           | EPB41                | 5  | 89897000 |
| FOP flare | A0A0C4DH31                          | Immunoglobulin heavy variable 1-18                                                                                    | IGHV1-18             | 1  | 89732000 |
| FOP flare | A0A0A0MS15                          | Immunoglobulin heavy variable 3-49                                                                                    | IGHV3-49             | 1  | 89193000 |
| FOP flare | F5H5D3;Q71U36-2;Q9BQE3;Q71U36-1     | Tubulin alpha-1A chain;Tubulin alpha-1C chain;Tubulin alpha-1B chain                                                  | TUBA1C;TUBA1A;TUBA1B | 4  | 89016000 |
| FOP flare | A0A087WSY5;Q96IY4                   | Carboxypeptidase B2                                                                                                   | CPB2                 | 1  | 88244000 |
| FOP flare | Q16610;Q16610-4;Q16610-3;Q16610-2   | Extracellular matrix protein 1                                                                                        | ECM1                 | 1  | 86692000 |
| FOP flare | P14618-2;P14618;H3BQ34;H3BT34       | Pyruvate kinase PKM;Pyruvate kinase PKM2                                                                              | PKM                  | 6  | 85943000 |
| FOP flare | E7EUT5;P04406-2;P04406              | Glyceraldehyde-3-phosphate dehydrogenase                                                                              | GAPDH                | 3  | 85874000 |
| FOP flare | A0A075B6H9                          | Immunoglobulin lambda variable 4-69                                                                                   | IGLV4-69             | 2  | 84931000 |
| FOP flare | P01709                              | Ig lambda chain V-II region MGC                                                                                       |                      | 2  | 83706000 |
| FOP flare | J3KPS3;P04075;P04075-2;H3BUH3       | Fructose-bisphosphate aldolase;Fructose-bisphosphate aldolase A                                                       | ALDOA                | 3  | 79879000 |
| FOP flare | P04430                              | Ig kappa chain V-I region BAN                                                                                         |                      | 1  | 76881000 |
| FOP flare | A0A0C4DH24                          | Immunoglobulin kappa variable 6-21                                                                                    | IGKV6-21             | 1  | 76646000 |
| FOP flare | P05556-2;P05556;P05556-5;P05556-4   | Integrin beta-1                                                                                                       | ITGB1                | 4  | 76166000 |
| FOP flare | P02741;C9JRE9;Q5VVP7;P02741-2       | C-reactive protein;C-reactive protein(1-205)                                                                          | CRP                  | 1  | 74188000 |
| FOP flare | P02741;C9JRE9;Q5VVP7;P02741-1       | Low affinity immunoglobulin gamma Fc region receptor III-A;Low affinity immunoglobulin gamma Fc region receptor III-B | FCGR3A;FCGR3B        | 2  | 72283000 |
| FOP flare | P02741;C9JRE9;Q5VVP7;P02741-3       | Peptidyl-prolyl cis-trans isomerase A;Peptidyl-prolyl cis-trans isomerase B                                           | PPIA                 | 2  | 72034000 |
| FOP flare | P02741;C9JRE9;Q5VVP7;P02741-4       | Lysozyme;Lysozyme C                                                                                                   | LYZ                  | 1  | 71107000 |
| FOP flare | P02741;C9JRE9;Q5VVP7;P02741-5       | Integrin-linked protein kinase                                                                                        | ILK                  | 4  | 69029000 |
| FOP flare | P02741;C9JRE9;Q5VVP7;P02741-6       | 14-3-3 protein epsilon                                                                                                | YWHAE                | 4  | 68978000 |
| FOP flare | P02741;C9JRE9;Q5VVP7;P02741-7       | Titin                                                                                                                 | TTN                  | 2  | 68251000 |

|           |                             |                                                                  |             |    |          |
|-----------|-----------------------------|------------------------------------------------------------------|-------------|----|----------|
| FOP flare | P02741;C9JRE9;Q5VVP7;P02741 | Protein Z-dependent protease inhibitor                           | SERPINA10   | 3  | 66645000 |
| FOP flare | P02741;C9JRE9;Q5VVP7;P02741 | SAFB-like transcription modulator                                | SLTM        | 2  | 64944000 |
| FOP flare | P02741;C9JRE9;Q5VVP7;P02741 | Tubulin beta-1 chain                                             | TUBB1       | 4  | 64652000 |
| FOP flare | P02741;C9JRE9;Q5VVP7;P02741 | Multimerin-1;Platelet glycoprotein Ia*;155 kDa platelet multim   | MMRN1       | 4  | 64064000 |
| FOP flare | P02741;C9JRE9;Q5VVP7;P02741 | Dematin                                                          | DMTN        | 3  | 62588000 |
| FOP flare | P02741;C9JRE9;Q5VVP7;P02741 | Alpha-actinin-1;Alpha-actinin-4                                  | ACTN1;ACTN4 | 5  | 57473000 |
| FOP flare | P02741;C9JRE9;Q5VVP7;P02741 | Phospholipid transfer protein                                    | PLTP        | 2  | 54517000 |
| FOP flare | P02741;C9JRE9;Q5VVP7;P02741 | Apolipoprotein F                                                 | APOF        | 1  | 54279000 |
| FOP flare | P02741;C9JRE9;Q5VVP7;P02741 | Tetranectin                                                      | CLEC3B      | 2  | 54231000 |
| FOP flare | P02741;C9JRE9;Q5VVP7;P02741 | Beta-Ala-His dipeptidase                                         | CNDP1       | 2  | 53573000 |
| FOP flare | P02741;C9JRE9;Q5VVP7;P02741 | Aminopeptidase N                                                 | ANPEP       | 5  | 52027000 |
| FOP flare | P02741;C9JRE9;Q5VVP7;P02741 | Protein disulfide-isomerase A3                                   | PDIA3       | 2  | 51287000 |
| FOP flare | P02741;C9JRE9;Q5VVP7;P02741 | Coagulation factor XI;Coagulation factor XIa heavy chain;Coagu   | F11         | 2  | 50777000 |
| FOP flare | P02741;C9JRE9;Q5VVP7;P02741 | Transforming growth factor-beta-induced protein ig-h3            | TGFBI       | 3  | 48255000 |
| FOP flare | P02741;C9JRE9;Q5VVP7;P02741 | Complement factor D                                              | CFD         | 2  | 48073000 |
| FOP flare | P02741;C9JRE9;Q5VVP7;P02741 | Plasma serine protease inhibitor                                 | SERPINA5    | 2  | 47575000 |
| FOP flare | P02741;C9JRE9;Q5VVP7;P02741 | Hemoglobin subunit delta                                         | HBD         | 8  | 47207000 |
| FOP flare | P02741;C9JRE9;Q5VVP7;P02741 | Platelet glycoprotein Ib alpha chain;Glycocalicin                | GP1BA       | 3  | 46323000 |
| FOP flare | P02741;C9JRE9;Q5VVP7;P02741 | Adenylyl cyclase-associated protein;Adenylyl cyclase-associated  | CAP1        | 3  | 45309000 |
| FOP flare | P02741;C9JRE9;Q5VVP7;P02741 | 14-3-3 protein theta;14-3-3 protein sigma                        | YWHAQ;SFN   | 4  | 45113000 |
| FOP flare | P02741;C9JRE9;Q5VVP7;P02741 | 78 kDa glucose-regulated protein                                 | HSPA5       | 3  | 43727000 |
| FOP flare | P02741;C9JRE9;Q5VVP7;P02741 | Dermcidin;Survival-promoting peptide;DCD-1                       | DCD         | 1  | 43680000 |
| FOP flare | A0A0C4DH72                  | Immunoglobulin kappa variable 1-6                                | IGKV1-6     | 3  | 43640000 |
| FOP flare | P02741;C9JRE9;Q5VVP7;P02741 | Ras-related C3 botulinum toxin substrate 1                       | RAC1        | 2  | 41796000 |
| FOP flare | P02741;C9JRE9;Q5VVP7;P02741 | Inter-alpha-trypsin inhibitor heavy chain H4;70 kDa inter-alpha- | ITIH4       | 26 | 41303000 |
| FOP flare | P02741;C9JRE9;Q5VVP7;P02741 | Vitamin K-dependent protein C;Vitamin K-dependent protein C      | PROC        | 2  | 41295000 |
| FOP flare | P02741;C9JRE9;Q5VVP7;P02741 | Guanine nucleotide-binding protein G(I)/G(S)/G(T) subunit beta   | GNB2;GNB4   | 3  | 41060000 |
| FOP flare | P02741;C9JRE9;Q5VVP7;P02741 | Platelet glycoprotein IX                                         | GP9         | 1  | 40026000 |
| FOP flare | P02741;C9JRE9;Q5VVP7;P02741 | Ig heavy chain V-I region HG3                                    |             | 1  | 39106000 |
| FOP flare | P02741;C9JRE9;Q5VVP7;P02741 | Chloride intracellular channel protein 1                         | CLIC1       | 1  | 36966000 |
| FOP flare | P02741;C9JRE9;Q5VVP7;P02741 | ATP synthase subunit alpha, mitochondrial                        | ATP5A1      | 2  | 36504000 |
| FOP flare | P02741;C9JRE9;Q5VVP7;P02741 | Sulfhydryl oxidase 1                                             | QSOX1       | 3  | 35250000 |
| FOP flare | P02741;C9JRE9;Q5VVP7;P02741 | Desmoplakin                                                      | DSP         | 4  | 35135000 |

|           |                             |                                                                  |                   |    |          |
|-----------|-----------------------------|------------------------------------------------------------------|-------------------|----|----------|
| FOP flare | P02741;C9JRE9;Q5VVP7;P02741 | Calmodulin                                                       | CALM2;CALM1;CALM  | 3  | 34410000 |
| FOP flare | P02741;C9JRE9;Q5VVP7;P02741 | WD repeat-containing protein 1                                   | WDR1              | 3  | 32109000 |
| FOP flare | P02741;C9JRE9;Q5VVP7;P02741 | Actin, alpha skeletal muscle;Actin, alpha cardiac muscle 1;Actin | ACTA1;ACTC1;ACTG  | 10 | 31774000 |
| FOP flare | P02741;C9JRE9;Q5VVP7;P02741 | Protein-tyrosine-phosphatase;Receptor-type tyrosine-protein p    | PTPRC             | 1  | 30783000 |
| FOP flare | P02741;C9JRE9;Q5VVP7;P02741 | Calreticulin                                                     | CALR              | 1  | 30354000 |
| FOP flare | P02741;C9JRE9;Q5VVP7;P02741 | Complement C4-B;Complement C4 beta chain;Complement C4-          | C4B               | 58 | 29857000 |
| FOP flare | IGHV3OR16-12                | Immunoglobulin heavy variable 3/OR16-12 (non-functional)         | IGHV3OR16-12      | 2  | 29528000 |
| FOP flare | P02741;C9JRE9;Q5VVP7;P02741 | Matrix metalloproteinase-9;67 kDa matrix metalloproteinase-9     | MMP9              | 2  | 28059000 |
| FOP flare | P02741;C9JRE9;Q5VVP7;P02741 | Cystatin-C                                                       | CST3              | 1  | 27873000 |
| FOP flare | P02741;C9JRE9;Q5VVP7;P02741 | 14-3-3 protein eta                                               | YWHAH             | 3  | 27770000 |
| FOP flare | P02741;C9JRE9;Q5VVP7;P02741 | Actin, cytoplasmic 2;Actin, cytoplasmic 2, N-terminally processe | ACTG1             | 18 | 27262000 |
| FOP flare | P02741;C9JRE9;Q5VVP7;P02741 | Apolipoprotein C-IV                                              | APOC4             | 2  | 26952000 |
| FOP flare | P02741;C9JRE9;Q5VVP7;P02741 | Monocyte differentiation antigen CD14;Monocyte differentiatio    | CD14              | 3  | 26302000 |
| FOP flare | P02741;C9JRE9;Q5VVP7;P02741 | Angiogenin                                                       | ANG               | 1  | 26148000 |
| FOP flare | P02741;C9JRE9;Q5VVP7;P02741 | Lactadherin;Lactadherin short form;Medin                         | MFGE8             | 1  | 25935000 |
| FOP flare | P02741;C9JRE9;Q5VVP7;P02741 | ATP synthase subunit beta;ATP synthase subunit beta, mitoch      | ATP5B             | 2  | 25435000 |
| FOP flare | P02741;C9JRE9;Q5VVP7;P02741 | Junction plakoglobin                                             | JUP               | 2  | 25351000 |
| FOP flare | P02741;C9JRE9;Q5VVP7;P02741 | Ig lambda chain V-I region NEWM                                  |                   | 1  | 25127000 |
| FOP flare | P02741;C9JRE9;Q5VVP7;P02741 | Solute carrier family 2, facilitated glucose transporter member  | SLC2A3            | 3  | 25076000 |
| FOP flare | AOA0C4DH67                  | Immunoglobulin kappa variable 1-8                                | IGKV1-8           | 1  | 23832000 |
| FOP flare | P02741;C9JRE9;Q5VVP7;P02741 | Proto-oncogene tyrosine-protein kinase Src                       | SRC               | 3  | 21487000 |
| FOP flare | P02741;C9JRE9;Q5VVP7;P02741 | EH domain-containing protein 3;EH domain-containing protein      | EHD1;EHD3;EHD2    | 2  | 21113000 |
| FOP flare | P02741;C9JRE9;Q5VVP7;P02741 | Ryanodine receptor 1                                             | RYR1              | 2  | 20489000 |
| FOP flare | P02741;C9JRE9;Q5VVP7;P02741 | Pleckstrin                                                       | PLEK              | 1  | 20138000 |
| FOP flare | P02741;C9JRE9;Q5VVP7;P02741 | Retinol-binding protein 4;Plasma retinol-binding protein(1-182)  | RBP4              | 2  | 20104000 |
| FOP flare | P02741;C9JRE9;Q5VVP7;P02741 | Ig lambda chain V region 4A                                      | IGLV7-46          | 1  | 20097000 |
| FOP flare | P02741;C9JRE9;Q5VVP7;P02741 | Protein S100-A4                                                  | S100A4            | 2  | 19695000 |
| FOP flare | P02741;C9JRE9;Q5VVP7;P02741 | Heat shock protein HSP 90-beta                                   | HSP90AB1          | 2  | 19100000 |
| FOP flare | P02741;C9JRE9;Q5VVP7;P02741 | Actin-related protein 2/3 complex subunit 1B                     | ARPC1B            | 1  | 19060000 |
| FOP flare | P02741;C9JRE9;Q5VVP7;P02741 | Myeloid-associated differentiation marker                        | MYADM             | 1  | 17751000 |
| FOP flare | P02741;C9JRE9;Q5VVP7;P02741 | Annexin;Annexin A2;Putative annexin A2-like protein              | ANXA2;ANXA2P2     | 2  | 17692000 |
| FOP flare | P02741;C9JRE9;Q5VVP7;P02741 | Actin-related protein 2/3 complex subunit 4                      | ARPC4;ARPC4-TTLL3 | 1  | 17153000 |
| FOP flare | P02741;C9JRE9;Q5VVP7;P02741 | Endoplasmin                                                      | HSP90B1           | 2  | 16572000 |

|           |                             |                                                                   |                 |   |          |
|-----------|-----------------------------|-------------------------------------------------------------------|-----------------|---|----------|
| FOP flare | P02741;C9JRE9;Q5VVP7;P02741 | Golgi-associated plant pathogenesis-related protein 1             | GLIPR2          | 1 | 15442000 |
| FOP flare | P02741;C9JRE9;Q5VVP7;P02741 | Coronin-1A;Coronin                                                | CORO1A          | 2 | 15333000 |
| FOP flare | P02751                      | Fibronectin                                                       | FN1             | 5 | 14234000 |
| FOP flare | P02741;C9JRE9;Q5VVP7;P02741 | Prostaglandin-H2 D-isomerase                                      | PTGDS           | 1 | 14187000 |
| FOP flare | P02741;C9JRE9;Q5VVP7;P02741 | Mannan-binding lectin serine protease 1;Mannan-binding lectin     | MASP1           | 2 | 13733000 |
| FOP flare | P02741;C9JRE9;Q5VVP7;P02741 | Transgelin-2                                                      | TAGLN2          | 1 | 12972000 |
| FOP flare | P02741;C9JRE9;Q5VVP7;P02741 | Na(+)/H(+) exchange regulatory cofactor NHE-RF2                   | SLC9A3R2        | 2 | 12660000 |
| FOP flare | P02741;C9JRE9;Q5VVP7;P02741 | Unconventional myosin-Ig;Minor histocompatibility antigen HA      | MYO1G           | 1 | 12553000 |
| FOP flare | P02741;C9JRE9;Q5VVP7;P02741 | Superoxide dismutase;Superoxide dismutase [Mn], mitochondrial     | SOD2            | 2 | 11613000 |
| FOP flare | P02741;C9JRE9;Q5VVP7;P02741 | Bleomycin hydrolase                                               | BLMH            | 2 | 11496000 |
| FOP flare | P02741;C9JRE9;Q5VVP7;P02741 | Brain acid soluble protein 1                                      | BASP1           | 1 | 10980000 |
| FOP flare | P02741;C9JRE9;Q5VVP7;P02741 | Flotillin-2                                                       | FLOT2           | 2 | 10201000 |
| FOP flare | P02741;C9JRE9;Q5VVP7;P02741 | Integrin alpha-6;Integrin alpha-6 heavy chain;Integrin alpha-6 li | ITGA6           | 1 | 10107000 |
| FOP flare | P02741;C9JRE9;Q5VVP7;P02741 | ADP/ATP translocase 3;ADP/ATP translocase 3, N-terminally pro     | SLC25A6;SLC25A5 | 1 | 9725700  |
| FOP flare | P02741;C9JRE9;Q5VVP7;P02741 | Peroxiredoxin-1                                                   | PRDX1           | 2 | 9191400  |
| FOP flare | P02741;C9JRE9;Q5VVP7;P02741 | Leukocyte elastase inhibitor                                      | SERPINB1        | 1 | 9045500  |
| FOP flare | P02741;C9JRE9;Q5VVP7;P02741 | Vitamin D-binding protein                                         | GC              | 8 | 8961300  |
| FOP flare | AOA0J9YY99                  | Ig-like domain-containing protein                                 | N/A             | 3 | 8935100  |
| FOP flare | P02741;C9JRE9;Q5VVP7;P02741 | SH3 domain-binding glutamic acid-rich-like protein 3              | SH3BGL3         | 1 | 8920400  |
| FOP flare | P02741;C9JRE9;Q5VVP7;P02741 | Tyrosine-protein kinase Lyn                                       | LYN             | 1 | 8898500  |
| FOP flare | P02741;C9JRE9;Q5VVP7;P02741 | Lactotransferrin;Lactoferricin-H;Kaliocin-1;Lactoferroxin-A;Lact  | LTF             | 2 | 8799100  |
| FOP flare | P02741;C9JRE9;Q5VVP7;P02741 | Sex hormone-binding globulin                                      | SHBG            | 1 | 8729200  |
| FOP flare | P02741;C9JRE9;Q5VVP7;P02741 | Plastin-2                                                         | LCP1            | 3 | 8597500  |
| FOP flare | P02741;C9JRE9;Q5VVP7;P02741 | Insulin-like growth factor-binding protein 5                      | IGFBP5          | 1 | 8093200  |
| FOP flare | P02741;C9JRE9;Q5VVP7;P02741 | Platelet endothelial cell adhesion molecule                       | PECAM1          | 1 | 8063600  |
| FOP flare | P02741;C9JRE9;Q5VVP7;P02741 | Complement C1r subcomponent-like protein                          | C1RL            | 1 | 7997700  |
| FOP flare | P02741;C9JRE9;Q5VVP7;P02741 | High affinity immunoglobulin epsilon receptor subunit gamma       | FCER1G          | 2 | 7496000  |
| FOP flare | AOA075B6H7                  | Probable non-functional immunoglobulin kappa variable 3-7         | IGKV3-7         | 2 | 7074200  |
| FOP flare | P02741;C9JRE9;Q5VVP7;P02741 | L-lactate dehydrogenase A chain                                   | LDHA            | 2 | 6677300  |
| FOP flare | P02741;C9JRE9;Q5VVP7;P02741 | Ig heavy chain V-I region V35                                     |                 | 1 | 5160400  |
| FOP flare | P02741;C9JRE9;Q5VVP7;P02741 | HLA class I histocompatibility antigen, B-40 alpha chain;HLA clas | HLA-B           | 3 | 4709400  |
| FOP flare | P02741;C9JRE9;Q5VVP7;P02741 | Cell division control protein 42 homolog                          | CDC42           | 1 | 4341800  |
| FOP flare | P02741;C9JRE9;Q5VVP7;P02741 | Adipocyte plasma membrane-associated protein                      | APMAP           | 1 | 3851100  |

|           |                             |                                                             |       |   |         |
|-----------|-----------------------------|-------------------------------------------------------------|-------|---|---------|
| FOP flare | P02741;C9JRE9;Q5VVP7;P02741 | Dopamine beta-hydroxylase;Soluble dopamine beta-hydroxylase | DBH   | 1 | 3185300 |
| FOP flare | P02741;C9JRE9;Q5VVP7;P02741 | Ras suppressor protein 1                                    | RSU1  | 1 | 2884200 |
| FOP flare | P02741;C9JRE9;Q5VVP7;P02741 | Cholesteryl ester transfer protein                          | CETP  | 2 | 2314700 |
| FOP flare | P02741;C9JRE9;Q5VVP7;P02741 | Actin-related protein 2/3 complex subunit 3                 | ARPC3 | 1 | 2113100 |
| FOP flare | P02741;C9JRE9;Q5VVP7;P02741 | Proteoglycan 4;Proteoglycan 4 C-terminal part               | PRG4  | 2 | 1725500 |
| FOP flare | P02741;C9JRE9;Q5VVP7;P02741 | Ras-related protein Rab-7a                                  | RAB7A | 1 | 1600000 |
